11 **Abstract**

12 Mitochondrial  $\text{Ca}^{2+}$  uniporter (MCU) mediates mitochondrial  $\text{Ca}^{2+}$  uptake, regulating ATP  
13 production and cell death. According to the existing paradigm, MCU is occluded at the resting  
14 cytosolic  $[\text{Ca}^{2+}]$  and only opens above an  $\sim 400$  nM threshold. This  $\text{Ca}^{2+}$ -dependent gating is  
15 putatively conferred by MICUs, EF hand-containing auxiliary subunits that block/unblock the  
16 MCU pore depending on cytosolic  $[\text{Ca}^{2+}]$ . Here we provide the first direct, patch-clamp based  
17 analysis of the  $\text{Ca}^{2+}$ -dependent MCU gating and the role played by MICUs. Surprisingly, MICUs  
18 do not occlude the MCU pore, and MCU is a constitutively active channel without cytosolic  
19  $[\text{Ca}^{2+}]$  activation threshold. Instead, MICUs potentiate MCU activity when cytosolic  $\text{Ca}^{2+}$  binds  
20 to their EF hands. MICUs cause this potentiation by increasing the probability of open state of  
21 the MCU channel.

22

23

24 **One Sentence Summary**

25 Auxiliary MICU subunits do not occlude the mitochondrial  $\text{Ca}^{2+}$  uniporter (MCU) but increase  
26 its activity as cytosolic  $\text{Ca}^{2+}$  is elevated.

27 **Main Text**

28 Mitochondrial  $\text{Ca}^{2+}$  uptake regulates ATP production, shapes intracellular  $\text{Ca}^{2+}$  transients  
29 and plays a crucial role in deciding cell fate (*1-4*). It is mediated by the mitochondrial  $\text{Ca}^{2+}$   
30 uniporter (MCU) (*3-5*), which upon elevation of cytosolic  $[\text{Ca}^{2+}]$  ( $[\text{Ca}^{2+}]_{\text{cyto}}$ ) allows selective  
31  $\text{Ca}^{2+}$  permeation into the mitochondrial matrix, down the high electrochemical gradient across  
32 the IMM. All  $\text{Ca}^{2+}$  channels lose their selectivity and become permeable for  $\text{Na}^+$  at low  $[\text{Ca}^{2+}]$ ,  
33 when  $\text{Ca}^{2+}$  is removed from the pore (*6-8*). MCU also conducts  $\text{Na}^+$  but only when  $[\text{Ca}^{2+}]$  is  
34 decreased to low nM range, because the MCU pore has a  $\text{Ca}^{2+}$  binding site with an exceptionally  
35 high affinity ( $K_d \leq 2$  nM) (*9-15*). This prevents permeation of abundant cytosolic monovalent  
36 cations even at a resting  $[\text{Ca}^{2+}]_{\text{cyto}}$  of  $\sim 100$  nM, and makes MCU the most selective  $\text{Ca}^{2+}$  channel  
37 known.

38 MCU activity must be regulated. Insufficient  $\text{Ca}^{2+}$  uptake would result in deficient ATP  
39 production, whereas excessive uptake would lead to mitochondrial  $\text{Ca}^{2+}$  overload,  $\Delta\Psi$   
40 dissipation, mitochondrial dysfunction and cell death (*16*). A few early studies suggested that  
41 MCU activity might be potentiated by cytosolic  $[\text{Ca}^{2+}]$  (*4, 17, 18*). However, the results differed  
42 significantly between labs, because MCU activity was assessed indirectly in suspensions of  
43 isolated mitochondria and critical experimental conditions could not be reliably controlled (*3, 4*).  
44 Thus, such potentiation was controversial and no clear unifying model for  $\text{Ca}^{2+}$ -dependent MCU  
45 gating was generated.

46 Recent molecular characterization established that MCU is a macromolecular complex  
47 (fig. S1A). Its pore is formed by the MCU subunit (*19, 20*) and the essential MCU regulator  
48 (EMRE) subunit (*21*). EF hand domain-containing auxiliary MICU1–3 subunits are tethered on  
49 the cytosolic side of the MCU/EMRE pore (*22, 23*). MICU1 interacts directly with the MCU and

50 EMRE, while MICU2 and MICU3 attach to the MCU complex only by heterodimerizing with  
51 MICU1 (21, 24-26). MICU3 is a neuronal- and embryonic-specific isoform with little expression  
52 in other tissues (23, 27).

53         The understanding of the molecular composition of the MCU complex renewed interest  
54 in the MCU gating by cytosolic  $\text{Ca}^{2+}$ . In MICU1 deficiency, when none of the MICU subunits is  
55 associated with the MCU/EMRE pore, mitochondrial  $\text{Ca}^{2+}$  ( $[\text{Ca}^{2+}]_{\text{mito}}$ ) starts to increase at lower  
56  $[\text{Ca}^{2+}]_{\text{cyto}}$  both in cells (24, 25, 28-31) and isolated mitochondria (32). Based on these results, the  
57 term “[ $\text{Ca}^{2+}$ ] $_{\text{cyto}}$  threshold for mitochondrial  $\text{Ca}^{2+}$  uptake” was coined, and it was postulated that  
58 MICU1 (in association with other MICUs) confers the  $[\text{Ca}^{2+}]_{\text{cyto}}$  threshold for MCU activation  
59 (28, 29). Specifically, the current paradigm suggests that at resting  $[\text{Ca}^{2+}]_{\text{cyto}}$ , MICU1 occludes  
60 the MCU pore (28, 33, 34), but when  $[\text{Ca}^{2+}]_{\text{cyto}}$  increases above ~400–800 nM and  $\text{Ca}^{2+}$  binds to  
61 the MICU1 EF hands, this occlusion is relieved (24, 28, 29) (Fig. 6A). MICU2 is proposed to  
62 facilitate this MICU1 function (24, 25, 35). In this model, the occlusion of MCU by  
63 MICU1/MICU2 at the resting  $[\text{Ca}^{2+}]_{\text{cyto}}$  is considered well-established (tables S1 and S2), while  
64 the degree to which the occlusion is removed at elevated  $[\text{Ca}^{2+}]_{\text{cyto}}$  remains controversial with  
65 different groups reporting a wide range of effects (tables S1 and S2). *MICU1*<sup>-/-</sup> mice show  
66 profound late embryonic and postnatal lethality (32, 36), while loss-of function MICU1  
67 mutations in humans cause fatigue, lethargy, severe myopathy, developmental and learning  
68 disabilities, and progressive extrapyramidal movement disorder (30, 37-39).

69         The paradigm that MICUs occlude the MCU pore at resting cytosolic  $\text{Ca}^{2+}$  and impart  
70  $[\text{Ca}^{2+}]_{\text{cyto}}$  activation threshold on MCU has affected the field profoundly. However, it has never  
71 been demonstrated by direct measurement of  $\text{Ca}^{2+}$  currents mediated by MCU. Instead, MCU  
72 activity was inferred from the changes in  $[\text{Ca}^{2+}]$  inside or outside of mitochondria, as measured

73 with  $\text{Ca}^{2+}$  indicators. However, such  $[\text{Ca}^{2+}]$  changes never reflect MCU activity alone but are  
74 determined by the balance between mitochondrial  $\text{Ca}^{2+}$  uptake and efflux mechanisms (3, 4, 40).  
75 Some of these studies (34, 36) used CGP37157 to inhibit the mitochondrial  $\text{Ca}^{2+}$  efflux  
76 associated with the  $\text{Ca}^{2+}/\text{Na}^+$  exchange mechanism, but this was clearly insufficient to eliminate  
77 all mitochondrial  $\text{Ca}^{2+}$  efflux. Indeed, if the  $\text{Ca}^{2+}$  efflux was fully eliminated, the free  $[\text{Ca}^{2+}]_{\text{mito}}$   
78 (based on the Nernst equation and assuming 100 nM  $[\text{Ca}^{2+}]_{\text{cyto}}$  and  $\Delta\Psi$  at -160 mV) would reach  
79 an enormous value of ~25 mM even with residual MCU activity. Other factors such as  $\Delta\Psi$ , the  
80 volume of mitochondrial matrix, matrix  $\text{Ca}^{2+}$  buffering with phosphates (40) and pH can further  
81 confound indirect assessment of MCU activity using  $\text{Ca}^{2+}$  indicators.

82         The numerous pitfalls associated with indirect assessment of MCU activity make direct  
83 measurements of MCU currents (9, 10, 41) necessary for understanding of MCU regulation and  
84 the role of MICU subunits. However, such direct measurements have been considered extremely  
85 challenging, especially in the context of structure–function studies of the MCU complex, which  
86 require assessment of numerous knockout and mutant models. There have been a few attempts to  
87 characterize MICU1-dependent regulation of MCU using direct electrophysiology, but the scope  
88 of electrophysiological experiments in these few studies was very limited, and MICU1 function  
89 was assessed only at high  $[\text{Ca}^{2+}]_{\text{cyto}}$  (42-44). These incomplete electrophysiological studies  
90 generated very diverse results ranging from inhibition to no effect of MICU1 on the MCU  
91 activity, and thus no clarity was achieved (table S1). One electrophysiological study tried to  
92 assess the effects of MICU1 and MICU2 at both low and high  $[\text{Ca}^{2+}]_{\text{cyto}}$  (table S1) (25).  
93 Unfortunately, in this study a recombinant MCU subunit was reconstituted in planar lipid  
94 bilayers in the absence of EMRE, the subunit essential for both a functional MCU channel and  
95 the association of MICU1/MICU2 with the MCU pore (25). The observed channel conducted

96 Na<sup>+</sup> even at μM [Ca<sup>2+</sup>] and failed to replicate the exceptionally high MCU selectivity for Ca<sup>2+</sup>.  
97 Thus, the channel activity observed in this EMRE-less system was artifactual.

98 Therefore, to facilitate a rigorous and systematic insight into the function of MICU1–3,  
99 as well as other subunits of the MCU complex, we developed a heterologous expression system  
100 for direct patch-clamp analysis of the MCU complex in the native IMM. Using this system, we  
101 demonstrate that MICUs do not occlude the MCU pore. We next demonstrate that the actual  
102 function of the MICU subunits is to potentiate MCU activity when their EF hands bind cytosolic  
103 Ca<sup>2+</sup>. Thus, MCU has no intrinsic [Ca<sup>2+</sup>]<sub>cyto</sub> activation threshold. It is a constitutively active  
104 channel that is potentiated by [Ca<sup>2+</sup>]<sub>cyto</sub> via the MICU subunits.

105

## 106 **Results**

### 107 **System for direct structure–function analysis of MCU**

108 Two factors are crucial to the success of the whole-IMM patch-clamp: the size of  
109 individual mitoplasts (vesicles of the whole native IMM) and the IMM stability during the  
110 electrophysiological experiments. Therefore, we tested various cell lines for the best possible  
111 optimization of these two factors. Eventually, we selected a *Drp1*<sup>-/-</sup> MEF cell line (45), in which  
112 mitochondria form long tubular networks and provide a significantly higher proportion of large  
113 isolated mitoplasts that are also remarkably resilient during the whole-IMM electrophysiological  
114 experiments. We confirmed that this cell line expresses all principal subunits of the MCU  
115 complex (fig. S2A-D). We next generated gene knockouts for all principal subunits of the MCU  
116 complex (MCU, EMRE and MICU1–3) using CRISPR-Cas9 in the background of *Drp1*<sup>-/-</sup> MEFs  
117 (fig. S1). All knockout cell lines lacked protein expression of the respective subunit (fig. S2A-C).

118 To explore the cytosolic/mitochondrial Ca<sup>2+</sup> phenotypes in these MCU complex knockout

119 cell lines, we induced slow elevation of  $[Ca^{2+}]_{cyto}$  using the SERCA inhibitor thapsigargin (Tg)  
120 and observed an associated increase in  $[Ca^{2+}]_{mito}$  (fig. S2E-J).  $[Ca^{2+}]_{cyto}$  was measured using  
121 Fura-2 while the mitochondrial  $Ca^{2+}$  changes were measured using a genetically-encoded  $Ca^{2+}$   
122 indicator *Cepia (46)* targeted to mitochondria.  $[Ca^{2+}]_{cyto}$  under resting conditions was maintained  
123  $\sim 75$  nM in all cell lines (fig. S2K) and peaked in the range of 400–1000 nM upon addition of Tg  
124 (fig. S2L). In cells with the *WT* MCU complex, the  $[Ca^{2+}]_{cyto}$  increase was followed, after a short  
125 delay, by  $[Ca^{2+}]_{mito}$  elevation (fig. S2E). However, as expected, in *MCU*<sup>-/-</sup> or *EMRE*<sup>-/-</sup> cell lines  
126 that have no functional MCU complex (*I9-21*), no significant  $[Ca^{2+}]_{mito}$  elevation was observed  
127 (fig. S2F and G). In *MICU1–3*-deficient cells, the  $[Ca^{2+}]_{cyto}$  threshold for elevation of  $[Ca^{2+}]_{mito}$   
128 was altered as compared to that in cells with the *WT* MCU complex (fig. S2H-J, and M). In  
129 *MICU1*<sup>-/-</sup> cells, the threshold was drastically decreased (fig. S2H and M), and a significant but  
130 less profound decrease was also observed in *MICU2*<sup>-/-</sup> cells (fig. S2I and M). However, *MICU3*<sup>-/-</sup>  
131 cells had an increased threshold (fig. S2J and M). Thus, in our cell system, we observed the same  
132  $[Ca^{2+}]_{mito}$  phenotypes associated with knockout of individual MCU complex subunits as reported  
133 previously (24, 25, 28, 29, 34).

134 We next explored how knockouts for various MCU complex subunits affect MCU  
135 currents. Importantly, the MCU complex was intact in isolated whole-IMM vesicles (mitoplasts)  
136 used in our patch-clamp experiments, and its composition was the same as in intact mitochondria  
137 based on MCU-FLAG co-immunoprecipitation experiments (fig. S4A). Mitoplasts isolated from  
138 cells with the *WT* MCU complex had a robust whole-IMM  $Ca^{2+}$  current ( $I_{Ca}$ ). The voltage step  
139 from 0 to -160 mV, followed by a voltage ramp to +80 mV, elicited an inwardly rectifying  $I_{Ca}$   
140 that gradually increased as  $[Ca^{2+}]_{cyto}$  (bath solution) was elevated (Fig. 1A, *left panel*, and fig.  
141 S3A and B). As expected, in a  $Ca^{2+}$ -free bath solution (control), we only observed an outward

142  $\text{Na}^+$  current ( $I_{\text{Na}}$ , black trace) via MCU, because the pipette solution contained  $\text{Na}^+$  (Fig. 1A, *left*  
143 *panel*, and fig. S3A and B).

144 Mitoplasts isolated from  $\text{MCU}^{-/-}$  and  $\text{EMRE}^{-/-}$  lines had no inward  $I_{\text{Ca}}$  or outward  $I_{\text{Na}}$ ,  
145 confirming the essential role of these two subunits for the functional MCU complex (21, 47, 48)  
146 (Fig. 1A and C). Importantly, even millimolar  $[\text{Ca}^{2+}]_{\text{cyto}}$  induced no  $I_{\text{Ca}}$  in  $\text{MCU}^{-/-}$  and  $\text{EMRE}^{-/-}$ ,  
147 demonstrating that MCU is the only electrogenic mechanism for mitochondrial  $\text{Ca}^{2+}$  uptake.  
148 Heterologous expression of MCU or EMRE in their corresponding knockout cell lines (fig. S4B  
149 and C) resulted in restoration of the inward  $I_{\text{Ca}}$  and outward  $I_{\text{Na}}$  (Fig. 1B and C).

150 Thus, we have identified a system that has robust MCU currents, can be used for  
151 heterologous expression of recombinant MCU complex subunits, and significantly improves  
152 throughput of whole-IMM patch-clamp recording.

153

#### 154 **MICUs are $\text{Ca}^{2+}$ -dependent MCU potentiators**

155 In contrast to  $\text{MCU}^{-/-}$  and  $\text{EMRE}^{-/-}$ , none of the MICU knockouts (MICU1–3) showed  
156 loss of  $I_{\text{Ca}}$  or  $I_{\text{Na}}$  (Fig. 1D), demonstrating that these subunits are not absolutely required for a  
157 functional MCU channel. However, among all MICU knockouts, loss of MICU1 resulted in a  
158 marked reduction (~50%) of  $I_{\text{Ca}}$  in both micromolar and millimolar ranges of  $[\text{Ca}^{2+}]_{\text{cyto}}$  (Fig. 1D  
159 and E, and fig. S5). The same reduction was observed when  $I_{\text{Ca}}$  was measured at both -160 mV  
160 (Fig. 1E) and -80 mV (fig. S5C). We next focused on understanding the mechanism by which  
161 MICU1 regulates MCU function.

162 As was suggested previously, MICU1 tethers other MICU subunits to the MCU/EMRE  
163 pore (21, 24-26). Thus, in  $\text{MICU1}^{-/-}$  none of the MICU subunits are associated with the MCU  
164 complex. The levels of MCU and MCUB (MCU paralog with no  $\text{Ca}^{2+}$  transport activity and



165 putative dominant-negative effect on the MCU function) subunits (49) were not affected in  
166 *MICU1*<sup>-/-</sup>, while EMRE expression was significantly reduced (fig. S6A-D), as was also shown  
167 previously (32). The lower EMRE expression in *MICU1*<sup>-/-</sup> was not a limiting factor for  $I_{Ca}$ ,  
168 because EMRE overexpression in *MICU1*<sup>-/-</sup> cells did not rescue the  $I_{Ca}$  reduction (fig. S6D-F).  
169 Therefore, the  $I_{Ca}$  reduction in *MICU1*<sup>-/-</sup> was caused by the lack of MICU1 (and other MICU  
170 proteins) in the MCU complex. Because  $I_{Ca}$  was recorded at  $[Ca^{2+}]_{cyto} \geq 10 \mu M$ , when the EF  
171 hands of MICU subunits ( $K_d \sim 600 \text{ nM}$ ) (50) are occupied by  $Ca^{2+}$ , we conclude that in the  $Ca^{2+}$ -  
172 bound state MICUs potentiate the MCU current.

173 We next studied how MICUs affect the MCU current when  $Ca^{2+}$  is not bound to their EF  
174 hands. Because this requires  $[Ca^{2+}]_{cyto} < 60 \text{ nM}$  (10-fold less than  $K_d$ ) and  $I_{Ca}$  cannot be measured  
175 reliably under these conditions, we used  $Na^+$  as the permeating ion. A robust  $I_{Na}$  via MCU was  
176 observed when  $Ca^{2+}$  was eliminated on the cytosolic face of the IMM with  $Ca^{2+}$  chelators (Fig.  
177 2A, left panel). As expected,  $I_{Na}$  completely disappeared in *MCU*<sup>-/-</sup> and *EMRE*<sup>-/-</sup> (Fig. 2A and B).  
178 Interestingly, in a striking contrast to  $I_{Ca}$ ,  $I_{Na}$  was not reduced in *MICU1*<sup>-/-</sup>, (Fig. 2C-E, also see  
179 Fig. 1D and E). The very presence of a robust  $I_{Na}$ , and the fact that it is not altered in *MICU1*<sup>-/-</sup>,  
180 argues strongly against the currently accepted paradigm (33, 34) in which the MCU/EMRE pore  
181 is occluded by MICUs when their EF hands are not occupied by  $Ca^{2+}$  (Fig. 6A). In the absence of  
182 cytosolic  $Ca^{2+}$ , a robust  $I_{Na}$  via MCU was also previously recorded in mitoplasts isolated from  
183 COS-7 cells, mouse heart and skeletal muscle (9, 10). Nanomolar concentrations of MCU  
184 inhibitor ruthenium red (RuR) completely block this  $I_{Na}$  (9, 10). In the absence of divalent  
185 cations, a RuR-sensitive,  $Na^+$ -selective MCU-dependent uniport was also reported in intact  
186 isolated mitochondria (51, 52). Thus, the MCU/EMRE pore is not occluded by MICU proteins  
187 when  $Ca^{2+}$  is not bound to their EF hands. Moreover, the similarity of  $I_{Na}$  amplitudes in *WT* and

188 *MICUI*<sup>-/-</sup> (Fig. 2C-E) suggests that in their Ca<sup>2+</sup>-free state MICUs do not affect ion permeation  
189 through the MCU/EMRE pore at all.

190 The *MICUI*<sup>-/-</sup> phenotypes of *I*<sub>Na</sub> (no change) and *I*<sub>Ca</sub> (reduction) suggest that the only  
191 function of MICUs is potentiation of the MCU complex activity when their EF hands are  
192 occupied by Ca<sup>2+</sup>. To further examine this phenotype, we studied how the ratio of *I*<sub>Ca</sub> to *I*<sub>Na</sub>, as  
193 measured in the same mitoplast, is affected by *MICUI*<sup>-/-</sup>. Such *I*<sub>Ca</sub>/*I*<sub>Na</sub> ratio depends only on the  
194 functional properties of the MCU complex, and, in contrast to *I*<sub>Ca</sub> and *I*<sub>Na</sub> amplitudes, is  
195 independent of the number of MCU complexes in a mitoplast. Thus, an alteration of the *I*<sub>Ca</sub>/*I*<sub>Na</sub>  
196 ratio in *MICUI*<sup>-/-</sup> can be directly attributed to altered functional properties of the MCU complex,  
197 and would not depend on any associated changes in MCU/EMRE expression affecting the  
198 number of MCU complexes.

199 The *I*<sub>Ca</sub>/*I*<sub>Na</sub> ratio was dramatically reduced in *MICUI*<sup>-/-</sup> mitoplasts (Fig. 2F), which means  
200 that the loss of MICUs is directly responsible for the reduction of *I*<sub>Ca</sub> as compared to *I*<sub>Na</sub>. The loss  
201 of MICUs can cause such reduction in the *I*<sub>Ca</sub>/*I*<sub>Na</sub> ratio by either altering the channel gating or  
202 affecting the relative affinities for Ca<sup>2+</sup> and Na<sup>+</sup> binding in the selectivity filter. The reduction in  
203 *I*<sub>Ca</sub>/*I*<sub>Na</sub> ratio in *MICUI*<sup>-/-</sup> could not be explained by altered relative affinities for Ca<sup>2+</sup> and Na<sup>+</sup>  
204 binding in the selectivity filter, because *I*<sub>Na</sub> was inhibited to the same extent by 2 nM [Ca<sup>2+</sup>]<sub>cyto</sub> in  
205 both *WT* and *MICUI*<sup>-/-</sup> mitoplasts (Fig. 2G and H). Thus, a reduced *I*<sub>Ca</sub>/*I*<sub>Na</sub> ratio in *MICUI*<sup>-/-</sup> is  
206 caused by a disrupted MICU-dependent gating mechanism. This gating mechanism potentiates  
207 MCU currents in a Ca<sup>2+</sup>-dependent fashion.

208 The above experiments were all performed in cell lines with disrupted *Drp1*. However,  
209 *Drp1* is not a part of the MCU complex, and therefore *Drp1* loss is not expected to affect MCU  
210 currents as measured directly with patch-clamp electrophysiology. Indeed, in our experiments

211 *Drp1* knockout did not affect the amplitudes of  $I_{Ca}$  or  $I_{Na}$  mediated by the MCU complex (fig.  
212 S7A and B). However, we still confirmed that the observed *MICU1*<sup>-/-</sup> current phenotypes were  
213 the same, irrespective of the *Drp1* background. Similar to MICU1 knockout in *Drp1*<sup>-/-</sup> MEFs,  
214 MICU1 knockout in *Drp1*<sup>+/+</sup> MEFs did not affect  $I_{Na}$  while markedly reduced  $I_{Ca}$  (fig. S7C-E).  
215 Additionally, *MICU1*<sup>-/-</sup> reduced the  $I_{Ca}/I_{Na}$  ratio, as measured in the same mitoplast, to the similar  
216 extent in *Drp1*<sup>+/+</sup> MEFs (fig. S7F). Thus, as expected, *Drp1* presence or absence does not affect  
217 currents mediated by the MCU complex or the *MICU1*<sup>-/-</sup> phenotypes.

218 To conclude, MICU subunits do not occlude the MCU/EMRE pore or impart a  $[Ca^{2+}]_{cyto}$   
219 activation threshold on the MCU complex. Instead, MCU is a constitutively active channel, and  
220 the actual function of MICU subunits is to potentiate MCU currents as  $[Ca^{2+}]_{cyto}$  is elevated.

221

## 222 **Role of EF hands of MICUs in $I_{Ca}$ potentiation**

223 To confirm that  $Ca^{2+}$  binding to the EF hands of MICUs is responsible for the  $Ca^{2+}$ -  
224 dependent potentiation of MCU, we recombinantly expressed MICU1-3 or MICU1-3 with  
225 mutated EF hands (mut-EF-MICU, to disable  $Ca^{2+}$  binding (24)) in their respective knockout cell  
226 lines and examined the changes in  $I_{Ca}$  (Fig. 3A).

227 In *MICU1*<sup>-/-</sup>, expression of MICU1 was able to restore  $I_{Ca}$  to the *WT* level, but mut-EF-  
228 MICU1 expression failed to do so (Fig. 3B). Expression levels of both the recombinant MICU1  
229 and mut-EF-MICU1 were significantly higher as compared to MICU1 expression in the cells  
230 with *WT* MCU complex (Fig. 3A). This confirms our hypothesis that  $Ca^{2+}$  binding to the EF  
231 hands of MICU1 is indispensable for  $I_{Ca}$  potentiation.

232 In *MICU2*<sup>-/-</sup>,  $I_{Ca}$  was not significantly affected (Fig. 3C, and 1D and E), because the loss  
233 of MICU2 appeared to be compensated with increased MICU1 expression and replacement of

234 MICU1/MICU2 heterodimer with MICU1/MICU1 homodimer (fig. S8A-C). Therefore,  
235 overexpression of recombinant MICU2 in *MICU2*<sup>-/-</sup> and preferential conversion of  
236 MICU1/MICU1 homodimers back into MICU1/MICU2 heterodimers also did not alter the *I*<sub>Ca</sub>  
237 amplitude (Fig. 3C). In contrast, mut-EF-MICU2 overexpression displaced MICU1 from  
238 MICU1/MICU1 homodimers in favor of MICU1/mut-EF-MICU2 heterodimer, leading to a  
239 dominant-negative effect and a significant decrease in MICU-dependent *I*<sub>Ca</sub> potentiation (Fig.  
240 3C). These functional data, combined with biochemical evidence for MICU1/MICU2  
241 heterodimers (25, 53, 54), suggest that MICU2, along with MICU1, is responsible for allosteric  
242 potentiation of MCU upon binding of cytosolic Ca<sup>2+</sup> to their EF hands.

243         The effect of *MICU1*<sup>-/-</sup> on *I*<sub>Ca</sub> was more profound as compared to that of *MICU2*<sup>-/-</sup> (Fig.  
244 1D and E), because MICU1 could compensate for MICU2. However, the reverse compensation  
245 was impossible, because only MICU1 tethers the MICU1/MICU2 heterodimer to the  
246 MCU/EMRE pore. The composition of MICU dimers can also be affected by MICU3 that  
247 similar to MICU2 was proposed to interact and form heterodimers with MICU1 (27). However,  
248 in our experiments, we did not observe robust current phenotypes associated with MICU3.  
249 Specifically, *I*<sub>Ca</sub> was not affected in *MICU3*<sup>-/-</sup> mitoplasts, and overexpression of recombinant  
250 MICU3 or mut-EF-MICU3 in *MICU3*<sup>-/-</sup> also had no effect on *I*<sub>Ca</sub> (Fig. 3D). It has been suggested  
251 that MICU3 is a minor protein as compared to MICU1 and 2 in the majority of tissues and cell  
252 lines assessed (27). Although in our system the amount of MICU3 mRNA appeared to be  
253 comparable with that of other MICU subunits (fig. S2D), and the MICU3 protein was expressed  
254 (Fig. 3A *right panel*, and fig. S2C), the relative abundance of MICU3 vs other MICUs is not  
255 clear. Moreover, in contrast to MICU1, MICU3 is not upregulated in *MICU2*<sup>-/-</sup> cells (fig. S8B),  
256 and thus, MICU3 expression does not appear to be linked to the level of MICU2. Therefore,

257 although MICU3 could in principle support the  $\text{Ca}^{2+}$ -dependent potentiation of MCU by forming  
258 dimers with MICU1 (27), the exact role of MICU3 and its interaction with other MCU complex  
259 subunits remains to be established.

260  $\text{Ca}^{2+}$  binding to the EF hands of MICU subunits and a subsequent conformational change  
261 that potentiates the MCU complex activity require a finite time and may delay  $I_{\text{Ca}}$   
262 activation/deactivation in response to changes in  $[\text{Ca}^{2+}]_{\text{cyto}}$ . Such delayed  $I_{\text{Ca}}$  kinetics can  
263 profoundly affect  $[\text{Ca}^{2+}]_{\text{mito}}$ , because in situ MCU takes up  $\text{Ca}^{2+}$  from  $\text{Ca}^{2+}$  microdomains (55)  
264 that exist in the cytosol only for a few milliseconds (56). Therefore, we examined  $I_{\text{Ca}}$  activation  
265 and deactivation kinetics in response to rapid changes in  $[\text{Ca}^{2+}]_{\text{cyto}}$  and tested whether they  
266 depend on MICUs.  $I_{\text{Ca}}$  activation upon rapid elevation of  $[\text{Ca}^{2+}]_{\text{cyto}}$  from virtually  $\text{Ca}^{2+}$ -free to 1  
267 mM was immediate, with kinetics comparable to the rate of solution exchange ( $\tau \sim 0.4$  ms)  
268 achieved by our piezoelectric fast application system (Fig. 3E). Importantly, the kinetics of the  
269  $I_{\text{Ca}}$  rapid response was not altered in *MICU1*<sup>-/-</sup> (Fig. 3E and F). The deactivation kinetics was  
270 similarly fast and not dependent on MICU1 (Fig. 3E and F). The result of these experiments  
271 correspond to the previous observation that EF hands of calmodulin bind  $\text{Ca}^{2+}$  with a  $\mu\text{s}$  time  
272 constant (57). The conclusion from these experiments is that the kinetics of  $\text{Ca}^{2+}$  binding to the  
273 MICU's EF hands, and the resultant conformational change in the MCU complex, are extremely  
274 fast, and thus MICU-dependent potentiation of the MCU activity should occur instantaneously  
275 upon elevation of the  $[\text{Ca}^{2+}]_{\text{cyto}}$ . This is perhaps true even within  $\text{Ca}^{2+}$  microdomains, but it has to  
276 be taken into account that in our experiments we used somewhat higher  $[\text{Ca}^{2+}]_{\text{cyto}}$  (1 mM) as  
277 compared to the maximal  $[\text{Ca}^{2+}]_{\text{cyto}}$  achieved in the microdomains (100  $\mu\text{M}$ ).

278 A phenomenon of  $\text{Ca}^{2+}$ -induced mitochondrial  $\text{Ca}^{2+}$  release (mCICR) by which  
279 mitochondria release  $\text{Ca}^{2+}$  into cytosol in response to elevations of  $[\text{Ca}^{2+}]_{\text{cyto}}$  has been observed

280 (4, 58, 59). mCICR required mitochondrial depolarization and was proposed to be mediated by  
281 MCU (60, 61) and/or the permeability transition pore (PTP) (58, 59). Therefore, we tested  
282 whether MCU can mediate  $\text{Ca}^{2+}$ -dependent  $\text{Ca}^{2+}$  efflux at depolarized membrane voltages and  
283 whether such efflux is dependent on MICUs. We measured outward  $I_{\text{Ca}}$  at positive voltages with  
284 2 mM  $[\text{Ca}^{2+}]_{\text{mito}}$  (the pipette solution), as  $[\text{Ca}^{2+}]_{\text{cyto}}$  was gradually elevated from virtual zero to 1  
285 mM. Remarkably, such  $[\text{Ca}^{2+}]_{\text{cyto}}$  elevation failed to induce any outward  $I_{\text{Ca}}$ . However, as  
286 expected, it caused a robust inward  $I_{\text{Ca}}$  (Fig. 3G). This experiment also demonstrates, as was also  
287 suggested previously (9), that MCU has a strong inward rectification (unidirectional  $\text{Ca}^{2+}$   
288 permeation into the matrix). This strong inward rectification of MCU under various  $[\text{Ca}^{2+}]_{\text{cyto}}$   
289 remained unaltered in *MICU1*<sup>-/-</sup> (Fig. 3G). Thus, MCU has a strong preference for conducting  
290  $\text{Ca}^{2+}$  into mitochondria and is unlikely to mediate  $\text{Ca}^{2+}$  release via mCICR.

291 It has also been suggested that MCU is regulated by matrix  $[\text{Ca}^{2+}]$  (62). Specifically,  $I_{\text{Ca}}$   
292 was shown to be profoundly reduced at  $[\text{Ca}^{2+}]_{\text{mito}} \sim 400$  nM, as compared to that at both lower  
293 ( $\text{Ca}^{2+}$ -free) and higher (high  $\mu\text{M}$ )  $[\text{Ca}^{2+}]_{\text{mito}}$  (62). The authors also proposed that the reduction of  
294 the MCU current at  $[\text{Ca}^{2+}]_{\text{mito}} \sim 400$  nM is MICU1-dependent. However, in contrast to this  
295 previous observation, in our experiments  $I_{\text{Ca}}$  amplitude remained unaltered when  $[\text{Ca}^{2+}]_{\text{mito}}$  was  
296 set at  $\text{Ca}^{2+}$ -free, 400 nM, or 400  $\mu\text{M}$  (fig. S9). Thus, the MCU complex is not regulated by  
297 matrix  $\text{Ca}^{2+}$ , and MICUs only impart the regulation of the MCU complex by cytosolic  $\text{Ca}^{2+}$ . It  
298 should also be mentioned that the authors proposed a membrane topology of EMRE (62) that is  
299 reverse to that determined in the recent biochemical and structural studies (14, 26).

300 Taken together, these data indicate that MICU proteins allosterically potentiate MCU-  
301 mediated  $\text{Ca}^{2+}$  influx when cytosolic  $\text{Ca}^{2+}$  binds to their EF hands.

302

303 **MICUs increase the open probability of MCU**

304 To investigate the mechanism by which  $\text{Ca}^{2+}$ -bound MICU proteins potentiate  $I_{\text{Ca}}$ , we  
305 examined the activity of single MCU channels in inside-out (matrix-side out) IMM patches.  
306 Because the unitary  $\text{Ca}^{2+}$  current ( $i_{\text{Ca}}$ , current via a single MCU channel) is very small ( $<1$  pA), it  
307 must be recorded at high  $[\text{Ca}^{2+}] = 105$  mM to improve resolution (9). At this  $[\text{Ca}^{2+}]$ , EF hands of  
308 MICU subunits are fully saturated with  $\text{Ca}^{2+}$ .

309 MCU exhibits multiple levels of single channel conductance. These subconductances can  
310 be observed at all tested voltages (-40, -80, and -120 mV), but their resolution improves  
311 markedly as transmembrane voltage becomes more negative. At -120 mV, in addition to what  
312 appears to be a fully open  $i_{\text{Ca}}$ , subconductances at  $\sim 0.8$  and  $\sim 0.6$  of the amplitude of the fully  
313 open  $i_{\text{Ca}}$  can be easily detected (Fig. 4A and C). Because similar amplitude levels were observed  
314 in all the patches, we conclude that these events represent genuine subconductances in the MCU  
315 channel.

316 There was no difference in the single channel amplitude between control and *MICU1*<sup>-/-</sup>  
317 mitoplasts (Fig. 4A-C). However, we found that the single-channel open probability ( $P_o$ ) was  
318 significantly decreased  $\sim 2$ – $3$  fold in *MICU1*<sup>-/-</sup> versus *WT* mitoplasts, depending on the  
319 transmembrane voltage (Fig. 4A, B, D and fig. S10A-C). As a result, the time-averaged current  
320 contributed by a single MCU channel differs significantly between control and *MICU1*<sup>-/-</sup>  
321 mitoplasts (Fig. 4E), thus mirroring and explaining the effect of MICU1 knockout on the  
322 amplitude of the whole-mitoplast  $I_{\text{Ca}}$  (Fig. 1E).

323 These results demonstrate that the potentiating effect of MICU proteins on the  
324 MCU/EMRE pore is not associated with an increased single-channel conductance. Rather, when  
325 their EF hands bind  $\text{Ca}^{2+}$ , MICUs increase MCU currents by causing an increase in the open

326 probability of the MCU/EMRE pore.

327

### 328 **MICU1 does not affect the Mn<sup>2+</sup> vs Ca<sup>2+</sup> permeability of MCU**

329 While Mn<sup>2+</sup> is essential for the proper function of several mitochondrial enzymes, its  
330 excessive accumulation inhibits oxidative phosphorylation and causes toxicity (63). MCU  
331 appears to be the primary pathway for Mn<sup>2+</sup> entry into mitochondria (4). Recently, it has been  
332 suggested that MICU1 is responsible for the relatively low permeability of MCU for Mn<sup>2+</sup> as  
333 compared to Ca<sup>2+</sup>, and MICU1 deficiency or loss-of-function MICU1 mutations in patients can  
334 lead to excessive mitochondrial Mn<sup>2+</sup> accumulation and cellular toxicity (42, 64). These  
335 observations were explained within the paradigm in which MICU1 occludes the MCU/EMRE  
336 pore. It was postulated that Mn<sup>2+</sup> binds to MICU1 EF hands but, in contrast to Ca<sup>2+</sup>, cannot  
337 induce the MICU1 conformation change necessary to unblock the MCU pore. Thus, MICU1  
338 prevents Mn<sup>2+</sup> permeation via MCU and ensures selective Ca<sup>2+</sup> permeation (42, 64).

339 We recorded the inward Mn<sup>2+</sup> current ( $I_{Mn}$ ) in the presence of 5 mM [Mn<sup>2+</sup>]<sub>cyto</sub>.  $I_{Mn}$   
340 disappeared in *MCU*<sup>-/-</sup> and *EMRE*<sup>-/-</sup>, confirming that it was solely mediated by MCU (Fig. 5A-  
341 D). As was also shown previously (9),  $I_{Mn}$  was indeed significantly smaller (~7-fold) than  $I_{Ca}$  at 5  
342 mM [Mn<sup>2+</sup>]<sub>cyto</sub> and 5 mM [Ca<sup>2+</sup>]<sub>cyto</sub>, respectively (Fig. 5E). However, we also observed that  $I_{Mn}$   
343 and  $I_{Ca}$  were reduced to a similar extent in *MICU1*<sup>-/-</sup> (Fig. 5F-H). This result was in a striking  
344 contrast to the current MICU1-based model for Mn<sup>2+</sup> vs Ca<sup>2+</sup> selectivity of MCU (42, 64), under  
345 which  $I_{Mn}$  would be increased but  $I_{Ca}$  not affected under our experimental conditions. Moreover,  
346 even the ratio between  $I_{Mn}$  and  $I_{Ca}$  calculated from the same mitoplast ( $I_{Mn}/I_{Ca}$ ) was not affected  
347 in *MICU1*<sup>-/-</sup> (Fig. 5I), although it is expected to be decreased as per the MICU1-based model for  
348 Mn<sup>2+</sup> vs Ca<sup>2+</sup> selectivity of MCU (42, 64). Finally, Mn<sup>2+</sup> inhibited  $I_{Ca}$  to the same extent in *WT*



349 and *MICU1*<sup>-/-</sup> mitoplasts (Fig. 5F and J), indicating that Ca<sup>2+</sup> and Mn<sup>2+</sup> are likely to compete in  
350 the selectivity filter of the MCU/EMRE pore.

351 Thus, the *I*<sub>Ca</sub> and *I*<sub>Mn</sub> phenotypes of *MICU1*<sup>-/-</sup> are the same, and MICU1 does not  
352 determine the preference of MCU for Ca<sup>2+</sup> over Mn<sup>2+</sup>. Permeation of both Ca<sup>2+</sup> and Mn<sup>2+</sup> is  
353 enhanced, rather than inhibited by MICU1. Instead of MICU1, the selectivity of the MCU  
354 complex for Ca<sup>2+</sup> over Mn<sup>2+</sup> (and for any other ion) should be determined by the selectivity filter  
355 located in the pore (11-13, 15), exactly as in other ion channels. Thus, the properties of Mn<sup>2+</sup>  
356 permeation via MCU cannot be explained within the paradigm in which MICUs occlude the  
357 MCU/EMRE pore, nor it can be used to validate it.

358

## 359 Discussion

360 In summary, the direct patch-clamp analysis presented here argues for a significant  
361 revision of the current paradigm for the gating of the MCU complex, its control by [Ca<sup>2+</sup>]<sub>cyto</sub>, and  
362 the role played by MICU subunits (Fig. 6).

363 In contrast to the existing model, we demonstrated that at low [Ca<sup>2+</sup>]<sub>cyto</sub>, when EF hands  
364 of MICU subunits are Ca<sup>2+</sup>-free, the MCU/EMRE pore is not occluded by MICUs and conducts  
365 robust Na<sup>+</sup> current regardless of MICU's presence. Thus, the MCU complex is a constitutively  
366 active channel. We further demonstrated that the real function of MICU subunits is to potentiate  
367 the activity of the MCU complex as cytosolic Ca<sup>2+</sup> is elevated and binds to MICU's EF hands  
368 (Fig. 6B). MICU subunits potentiate MCU activity by increasing the open state probability of the  
369 MCU/EMRE pore. MICUs are likely to achieve this effect by interacting with EMRE that is  
370 predicted to control the gating of the MCU/EMRE pore (14). The recent cryo-EM structures of  
371 the complete MCU complex clarify this mechanism further and suggests that MICU1/MICU2

372 dimers connect (at the cytosolic side) EMREs of two different MCU/EMRE pores and could  
373 control MCU gating by pulling on these EMREs.

374 MICU1/MICU2 dimer binds cytosolic  $\text{Ca}^{2+}$  with  $K_d \sim 600$  nM (50). To understand the  
375  $\text{Ca}^{2+}$ -dependent function of the MICU1/MICU2 dimer, the effects of MICUs on the  
376 MCU/EMRE pore must be studied at the two extremes of the EF-hand  $\text{Ca}^{2+}$  titration range –  
377 when all MICUs are essentially  $\text{Ca}^{2+}$ -free and when they are fully occupied by  $\text{Ca}^{2+}$ . This can be  
378 achieved by measuring the two types of currents via the MCU complex -  $I_{\text{Na}}$  and  $I_{\text{Ca}}$ .

379 As we demonstrated previously (9, 10) and also elaborate in this work, the MCU complex  
380 can conduct both  $\text{Na}^+$  and  $\text{Ca}^{2+}$ . This is because  $\text{Ca}^{2+}$  and  $\text{Na}^+$  have very similar radii and both  
381 can bind to and permeate through the narrowest  $\text{Ca}^{2+}$  binding site in the MCU selectivity filter,  
382 similar to other  $\text{Ca}^{2+}$  channels (6, 11-13).  $I_{\text{Na}}$  and  $I_{\text{Ca}}$  have been instrumental in understanding the  
383 MCU channel and its exceptionally high  $\text{Ca}^{2+}$  selectivity (9, 10).  $I_{\text{Na}}$  is measurable only when  
384  $[\text{Ca}^{2+}]_{\text{cyto}} \leq 2$  nM (Fig. 2G), while  $I_{\text{Ca}}$  can only be measured at  $[\text{Ca}^{2+}]_{\text{cyto}} \geq 10$   $\mu\text{M}$  (Fig. 1D). In  
385 between 2 nM and 10  $\mu\text{M}$ , lies a  $[\text{Ca}^{2+}]_{\text{cyto}}$  range where MCU currents are extremely small and  
386 cannot be measured reliably. Such “no-current” range is not a unique property of MCU, but is a  
387 characteristic property of all  $\text{Ca}^{2+}$ -selective channels and is explained by the anomalous mole-  
388 fraction effect, a phenomenon of binding and competition between two different ions ( $\text{Na}^+$  and  
389  $\text{Ca}^{2+}$ ) in the selectivity filter (65). However, by measuring  $I_{\text{Na}}$  and  $I_{\text{Ca}}$ , the patch-clamp  
390 electrophysiology can reliably establish the effect of MICUs on the MCU/EMRE pore at the two  
391 extremes of the EF-hand  $\text{Ca}^{2+}$  titration range – when all EF hands are either in the  $\text{Ca}^{2+}$ -free state  
392 or in the  $\text{Ca}^{2+}$ -occupied state. It is important to understand that such direct measurement of  $I_{\text{Na}}$   
393 and  $I_{\text{Ca}}$  is the only reliable way to assess the function of MICU subunits within the MCU  
394 complex.

395 It is tempting to assume that optical methods can assess the MCU complex activity and  
396 the MICU function continuously over a wide  $[Ca^{2+}]_{cyto}$  range, starting from high nM. This  
397 perceived “high sensitivity” of optical methods is achieved by integration of the net  
398 mitochondrial  $Ca^{2+}$  influx (even if it is very slow) over a period of time, resulting in a  
399 measurable  $[Ca^{2+}]_{mito}$  change. However, it must be realized that the optical methods do not  
400 measure MCU activity directly or in isolation from other  $Ca^{2+}$  transport mechanisms, and do not  
401 permit adequate control over the experimental conditions. When  $[Ca^{2+}]_{cyto}$  is in the high nM  
402 range (around the resting levels), the MCU-mediated  $Ca^{2+}$  uptake is very slow and exists in an  
403 equilibrium with the mitochondrial  $Ca^{2+}$  efflux mechanisms (40). Thus, any measured changes in  
404  $[Ca^{2+}]_{mito}$  cannot be assigned to MCU exclusively. When  $[Ca^{2+}]_{cyto}$  is elevated into the  $\mu M$  range,  
405 the MCU activity becomes high and overwhelms not only the  $Ca^{2+}$  efflux machinery but also the  
406 electron transport chain, resulting in a decreased driving force for  $Ca^{2+}$  and underestimation of  
407 the MCU activity (3, 4). Because of all these technical limitations, measuring the effect of MICU  
408 knockouts on  $I_{Na}$  at nM  $[Ca^{2+}]_{cyto}$  and on  $I_{Ca}$  at  $\mu M$   $[Ca^{2+}]_{cyto}$  with direct patch-clamp  
409 electrophysiology is the only way to reliably study the MICU function.

410 Here we demonstrate that the MCU complex is constitutively active and has no intrinsic  
411  $[Ca^{2+}]_{cyto}$  threshold. A recent report also suggested no apparent  $[Ca^{2+}]_{cyto}$  threshold for MCU in  
412 heart and skeletal muscle (66). Thus, the  $[Ca^{2+}]_{cyto}$  threshold for elevation of  $[Ca^{2+}]_{mito}$  is simply  
413 determined by the equilibrium between the MCU-dependent  $Ca^{2+}$  uptake and the mitochondrial  
414  $Ca^{2+}$  efflux mechanisms. Such a simple equilibrium-based  $[Ca^{2+}]_{cyto}$  threshold for  $[Ca^{2+}]_{mito}$   
415 elevation was proposed previously and was termed the “set point” (40).

416 Assuming that the  $K_d$  for  $Ca^{2+}$  binding to MICU EF hands is  $\sim 600$  nM (50), MICUs  
417 would start potentiating the MCU complex activity already in the high nanomolar range of

418  $[Ca^{2+}]_{cyto}$ , around the resting levels. Thus, MICUs should help MCU to overcome the  
419 mitochondrial  $Ca^{2+}$  efflux machinery and decrease the set point.

420 It is therefore paradoxical that the optical studies report not an increase but a decrease in  
421 “threshold” for mitochondrial  $Ca^{2+}$  uptake in *MICU1*<sup>-/-</sup>. However, it simply illustrates that the  
422 results of the optical experiments should be interpreted with a caution not only at the level of  
423 MCU but also at the level of the whole organelle. The set point for mitochondrial  $Ca^{2+}$   
424 accumulation is affected not only by the MCU-mediated uptake but also by mitochondrial  $Ca^{2+}$   
425 efflux and numerous other factors such as  $\Delta\psi$ , matrix pH, permeability of the outer  
426 mitochondrial membrane, and mitochondria-ER interface, to mention the most obvious. These  
427 factors can also change and overcompensate for the reduced MCU activity in *MICU1*<sup>-/-</sup>, resulting  
428 in a decreased set point. In contrast to the *MICU1*<sup>-/-</sup>, such overcompensation, however, cannot  
429 correct the phenotype of MCU and EMRE knockouts because the mitochondrial  $Ca^{2+}$  uptake is  
430 completely eliminated. To further illustrate these points, in species other than mammals, where  
431 the compensatory mechanisms induced by MICU1 knockout may be different, the  $[Ca^{2+}]_{cyto}$   
432 “threshold” for  $[Ca^{2+}]_{mito}$  elevation is affected in a different way, although the composition of the  
433 MCU complex (including EMRE and MICU1) is similar to mammals. Specifically, in  
434 *Trypanosoma cruzi*, MICU1 knockout causes an increase in the  $Ca^{2+}$  uptake “threshold” and a  
435 marked decrease in  $Ca^{2+}$  uptake capacity at all  $[Ca^{2+}]_{cyto}$  (67). The possibility that MICU proteins  
436 have other functions (68) beyond being a part of the MCU complex can further complicate the  
437 interpretation of the *MICU1*<sup>-/-</sup> phenotype as assessed by optical methods. In *Drosophila*, a lethal  
438 phenotype of MICU1 knockout was not rescued when combined with either MCU or EMRE  
439 knockouts (the MCU and EMRE knockouts themselves had mild phenotypes), suggesting  
440 functions for MICU proteins beyond the MCU complex (68). Thus, the results obtained with

441 optical methods must be interpreted with due consideration to direct electrophysiological and  
442 structural data on the MCU complex. Otherwise, not only the properties of the MCU complex,  
443 but also mitochondrial  $\text{Ca}^{2+}$  homeostasis in general will be misunderstood.

444 In summary, we demonstrate that MICUs are  $\text{Ca}^{2+}$ -dependent MCU potentiators. They  
445 are likely to exert their potentiating effect over a range of  $[\text{Ca}^{2+}]_{\text{cyto}}$  from resting to high  
446 micromolar. By doing so, MICUs can control both the  $[\text{Ca}^{2+}]_{\text{cyto}}$  set point for  $[\text{Ca}^{2+}]_{\text{mito}}$  elevation  
447 and the maximum  $[\text{Ca}^{2+}]_{\text{mito}}$  reached during intracellular  $\text{Ca}^{2+}$  signaling. Importantly, the  
448 potentiation of MCU by MICUs could help to reduce the number of MCU channels required for  
449 adequate  $\text{Ca}^{2+}$ -dependent stimulation of mitochondrial ATP production. Without MICUs, the  
450 number of MCU channels per mitochondrion would have to be ~2 times higher, which would  
451 also increase futile  $\text{Ca}^{2+}$  cycling at resting  $[\text{Ca}^{2+}]_{\text{cyto}}$ .

## 452 REFERENCES AND NOTES

- 453 1. B. Glancy, R. S. Balaban, Role of mitochondrial Ca<sup>2+</sup> in the regulation of cellular energetics.  
454 *Biochemistry* **51**, 2959-2973 (2012).
- 455 2. M. J. Berridge, M. D. Bootman, H. L. Roderick, Calcium signalling: dynamics, homeostasis and  
456 remodelling. *Nature reviews* **4**, 517-529 (2003).
- 457 3. P. Bernardi, Mitochondrial transport of cations: channels, exchangers, and permeability  
458 transition. *Physiol Rev* **79**, 1127-1155 (1999).
- 459 4. T. E. Gunter, D. R. Pfeiffer, Mechanisms by which mitochondria transport calcium. *Am J Physiol*  
460 **258**, C755-786 (1990).
- 461 5. H. F. Deluca, G. W. Engstrom, Calcium uptake by rat kidney mitochondria. *Proc Natl Acad Sci U S*  
462 *A* **47**, 1744-1750 (1961).
- 463 6. L. Tang *et al.*, Structural basis for Ca<sup>2+</sup> selectivity of a voltage-gated calcium channel. *Nature* **505**,  
464 56-61 (2014).
- 465 7. P. Hess, J. B. Lansman, R. W. Tsien, Calcium channel selectivity for divalent and monovalent  
466 cations. Voltage and concentration dependence of single channel current in ventricular heart  
467 cells. *J Gen Physiol* **88**, 293-319 (1986).
- 468 8. P. Hess, R. W. Tsien, Mechanism of ion permeation through calcium channels. *Nature* **309**, 453-  
469 456 (1984).
- 470 9. Y. Kirichok, G. Krapivinsky, D. E. Clapham, The mitochondrial calcium uniporter is a highly selective  
471 ion channel. *Nature* **427**, 360-364 (2004).
- 472 10. F. Fieni, S. B. Lee, Y. N. Jan, Y. Kirichok, Activity of the mitochondrial calcium uniporter varies  
473 greatly between tissues. *Nat Commun* **3**, 1317 (2012).
- 474 11. N. X. Nguyen *et al.*, Cryo-EM structure of a fungal mitochondrial calcium uniporter. *Nature* **559**,  
475 570-574 (2018).
- 476 12. C. Fan *et al.*, X-ray and cryo-EM structures of the mitochondrial calcium uniporter. *Nature* **559**,  
477 575-579 (2018).
- 478 13. R. Baradaran, C. Wang, A. F. Siliciano, S. B. Long, Cryo-EM structures of fungal and metazoan  
479 mitochondrial calcium uniporters. *Nature* **559**, 580-584 (2018).
- 480 14. Y. Wang *et al.*, Structural Mechanism of EMRE-Dependent Gating of the Human Mitochondrial  
481 Calcium Uniporter. *Cell* **177**, 1252-1261 e1213 (2019).
- 482 15. J. Yoo *et al.*, Cryo-EM structure of a mitochondrial calcium uniporter. *Science* **361**, 506-511 (2018).
- 483 16. P. Bernardi, A. Rasola, Calcium and cell death: the mitochondrial connection. *Subcell Biochem* **45**,  
484 481-506 (2007).
- 485 17. H. Kroner, Ca<sup>2+</sup> ions, an allosteric activator of calcium uptake in rat liver mitochondria. *Arch*  
486 *Biochem Biophys* **251**, 525-535 (1986).
- 487 18. A. Vinogradov, A. Scarpa, The initial velocities of calcium uptake by rat liver mitochondria. *J Biol*  
488 *Chem* **248**, 5527-5531 (1973).
- 489 19. J. M. Baughman *et al.*, Integrative genomics identifies MCU as an essential component of the  
490 mitochondrial calcium uniporter. *Nature* **476**, 341-345 (2011).
- 491 20. D. De Stefani, A. Raffaello, E. Teardo, I. Szabo, R. Rizzuto, A forty-kilodalton protein of the inner  
492 membrane is the mitochondrial calcium uniporter. *Nature* **476**, 336-340 (2011).
- 493 21. Y. Sancak *et al.*, EMRE is an essential component of the mitochondrial calcium uniporter complex.  
494 *Science* **342**, 1379-1382 (2013).
- 495 22. F. Perocchi *et al.*, MICU1 encodes a mitochondrial EF hand protein required for Ca<sup>2+</sup> uptake.  
496 *Nature* **467**, 291-296 (2010).
- 497 23. M. Plovanich *et al.*, MICU2, a paralog of MICU1, resides within the mitochondrial uniporter  
498 complex to regulate calcium handling. *PLoS One* **8**, e55785 (2013).

- 499 24. K. J. Kamer, V. K. Mootha, MICU1 and MICU2 play nonredundant roles in the regulation of the  
500 mitochondrial calcium uniporter. *EMBO Rep* **15**, 299-307 (2014).
- 501 25. M. Patron *et al.*, MICU1 and MICU2 finely tune the mitochondrial Ca<sup>2+</sup> uniporter by exerting  
502 opposite effects on MCU activity. *Mol Cell* **53**, 726-737 (2014).
- 503 26. M. F. Tsai *et al.*, Dual functions of a small regulatory subunit in the mitochondrial calcium  
504 uniporter complex. *eLife* **5**, (2016).
- 505 27. M. Patron, V. Granatiero, J. Espino, R. Rizzuto, D. De Stefani, MICU3 is a tissue-specific enhancer  
506 of mitochondrial calcium uptake. *Cell Death Differ* **26**, 179-195 (2019).
- 507 28. K. Mallilankaraman *et al.*, MICU1 is an essential gatekeeper for MCU-mediated mitochondrial  
508 Ca<sup>2+</sup> uptake that regulates cell survival. *Cell* **151**, 630-644 (2012).
- 509 29. G. Csordas *et al.*, MICU1 controls both the threshold and cooperative activation of the  
510 mitochondrial Ca<sup>2+</sup>(+) uniporter. *Cell Metab* **17**, 976-987 (2013).
- 511 30. C. V. Logan *et al.*, Loss-of-function mutations in MICU1 cause a brain and muscle disorder linked  
512 to primary alterations in mitochondrial calcium signaling. *Nat Genet* **46**, 188-193 (2014).
- 513 31. S. de la Fuente, J. Matesanz-Isabel, R. I. Fonteriz, M. Montero, J. Alvarez, Dynamics of  
514 mitochondrial Ca<sup>2+</sup> uptake in MICU1-knockdown cells. *Biochem J* **458**, 33-40 (2014).
- 515 32. J. C. Liu *et al.*, MICU1 Serves as a Molecular Gatekeeper to Prevent In Vivo Mitochondrial Calcium  
516 Overload. *Cell Rep* **16**, 1561-1573 (2016).
- 517 33. C. B. Phillips, C. W. Tsai, M. F. Tsai, The conserved aspartate ring of MCU mediates MICU1 binding  
518 and regulation in the mitochondrial calcium uniporter complex. *eLife* **8**, (2019).
- 519 34. M. Paillard *et al.*, MICU1 Interacts with the D-Ring of the MCU Pore to Control Its Ca<sup>2+</sup> Flux and  
520 Sensitivity to Ru360. *Mol Cell* **72**, 778-785 e773 (2018).
- 521 35. J. Matesanz-Isabel *et al.*, Functional roles of MICU1 and MICU2 in mitochondrial Ca<sup>2+</sup> uptake.  
522 *Biochim Biophys Acta* **1858**, 1110-1117 (2016).
- 523 36. A. N. Antony *et al.*, MICU1 regulation of mitochondrial Ca<sup>2+</sup> uptake dictates survival and tissue  
524 regeneration. *Nat Commun* **7**, 10955 (2016).
- 525 37. D. Lewis-Smith *et al.*, Homozygous deletion in MICU1 presenting with fatigue and lethargy in  
526 childhood. *Neurol Genet* **2**, e59 (2016).
- 527 38. S. Musa *et al.*, A Middle Eastern Founder Mutation Expands the Genotypic and Phenotypic  
528 Spectrum of Mitochondrial MICU1 Deficiency: A Report of 13 Patients. *JIMD Rep* **43**, 79-83 (2019).
- 529 39. G. Bhosale *et al.*, Pathological consequences of MICU1 mutations on mitochondrial calcium  
530 signalling and bioenergetics. *Biochim Biophys Acta* **1864**, 1009-1017 (2017).
- 531 40. D. G. Nicholls, Mitochondria and calcium signaling. *Cell Calcium* **38**, 311-317 (2005).
- 532 41. V. Garg, Y. Y. Kirichok, Patch-Clamp Analysis of the Mitochondrial Calcium Uniporter. *Methods*  
533 *Mol Biol* **1925**, 75-86 (2019).
- 534 42. K. J. Kamer *et al.*, MICU1 imparts the mitochondrial uniporter with the ability to discriminate  
535 between Ca<sup>2+</sup> and Mn<sup>2+</sup>. *Proc Natl Acad Sci U S A* **115**, E7960-E7969 (2018).
- 536 43. H. Vais *et al.*, EMRE Is a Matrix Ca<sup>2+</sup> Sensor that Governs Gatekeeping of the Mitochondrial  
537 Ca<sup>2+</sup> Uniporter. *Cell Rep* **14**, 403-410 (2016).
- 538 44. N. E. Hoffman *et al.*, MICU1 motifs define mitochondrial calcium uniporter binding and activity.  
539 *Cell Rep* **5**, 1576-1588 (2013).
- 540 45. N. Ishihara *et al.*, Mitochondrial fission factor Drp1 is essential for embryonic development and  
541 synapse formation in mice. *Nat Cell Biol* **11**, 958-966 (2009).
- 542 46. J. Suzuki *et al.*, Imaging intraorganellar Ca<sup>2+</sup> at subcellular resolution using CEPIA. *Nat Commun*  
543 **5**, 4153 (2014).
- 544 47. X. Pan *et al.*, The physiological role of mitochondrial calcium revealed by mice lacking the  
545 mitochondrial calcium uniporter. *Nat Cell Biol* **15**, 1464-1472 (2013).

- 546 48. E. Kovacs-Bogdan *et al.*, Reconstitution of the mitochondrial calcium uniporter in yeast. *Proc Natl Acad Sci U S A* **111**, 8985-8990 (2014).  
547
- 548 49. A. Raffaello *et al.*, The mitochondrial calcium uniporter is a multimer that can include a dominant-  
549 negative pore-forming subunit. *Embo J* **32**, 2362-2376 (2013).
- 550 50. K. J. Kamer, Z. Grabarek, V. K. Mootha, High-affinity cooperative Ca(2+) binding by MICU1-MICU2  
551 serves as an on-off switch for the uniporter. *EMBO Rep* **18**, 1397-1411 (2017).
- 552 51. P. Bernardi, A. Angrilli, G. F. Azzone, A gated pathway for electrophoretic Na<sup>+</sup> fluxes in rat liver  
553 mitochondria. Regulation by surface Mg<sup>2+</sup>. *Eur J Biochem* **188**, 91-97 (1990).
- 554 52. J. P. Wehrle, M. Jurkowitz, K. M. Scott, G. P. Brierley, Mg<sup>2+</sup> and the permeability of heart  
555 mitochondria to monovalent cations. *Arch Biochem Biophys* **174**, 313-323 (1976).
- 556 53. C. Petrunaro *et al.*, The Ca(2+)-Dependent Release of the Mia40-Induced MICU1-MICU2 Dimer  
557 from MCU Regulates Mitochondrial Ca(2+) Uptake. *Cell Metab* **22**, 721-733 (2015).
- 558 54. Y. Xing *et al.*, Dimerization of MICU Proteins Controls Ca(2+) Influx through the Mitochondrial  
559 Ca(2+) Uniporter. *Cell Rep* **26**, 1203-1212 e1204 (2019).
- 560 55. R. Rizzuto *et al.*, Close contacts with the endoplasmic reticulum as determinants of mitochondrial  
561 Ca<sup>2+</sup> responses. *Science* **280**, 1763-1766 (1998).
- 562 56. E. Neher, Vesicle pools and Ca<sup>2+</sup> microdomains: new tools for understanding their roles in  
563 neurotransmitter release. *Neuron* **20**, 389-399 (1998).
- 564 57. G. C. Faas, S. Raghavachari, J. E. Lisman, I. Mody, Calmodulin as a direct detector of Ca<sup>2+</sup> signals.  
565 *Nat Neurosci* **14**, 301-304 (2011).
- 566 58. P. Bernardi, V. Petronilli, The permeability transition pore as a mitochondrial calcium release  
567 channel: a critical appraisal. *J Bioenerg Biomembr* **28**, 131-138 (1996).
- 568 59. F. Ichas, L. S. Jouaville, J. P. Mazat, Mitochondria are excitable organelles capable of generating  
569 and conveying electrical and calcium signals. *Cell* **89**, 1145-1153 (1997).
- 570 60. M. Montero, M. T. Alonso, A. Albillos, J. Garcia-Sancho, J. Alvarez, Mitochondrial Ca(2+)-induced  
571 Ca(2+) release mediated by the Ca(2+) uniporter. *Mol Biol Cell* **12**, 63-71 (2001).
- 572 61. U. Igbavboa, D. R. Pfeiffer, Regulation of reverse uniport activity in mitochondria by  
573 extramitochondrial divalent cations. Dependence on a soluble intermembrane space component.  
574 *J Biol Chem* **266**, 4283-4287 (1991).
- 575 62. H. Vais *et al.*, EMRE Is a Matrix Ca(2+) Sensor that Governs Gatekeeping of the Mitochondrial  
576 Ca(2+) Uniporter. *Cell reports* **14**, 403-410 (2016).
- 577 63. T. E. Gunter *et al.*, An analysis of the effects of Mn<sup>2+</sup> on oxidative phosphorylation in liver, brain,  
578 and heart mitochondria using state 3 oxidation rate assays. *Toxicol Appl Pharmacol* **249**, 65-75  
579 (2010).
- 580 64. J. Wettmarshausen *et al.*, MICU1 Confers Protection from MCU-Dependent Manganese Toxicity.  
581 *Cell Rep* **25**, 1425-1435 e1427 (2018).
- 582 65. B. Hille, *Ionic channels of excitable membranes*. (Sinauer Associates, Sunderland, Mass., ed. 2nd,  
583 1992), pp. xiii, 607.
- 584 66. A. P. Wescott, J. P. Y. Kao, W. J. Lederer, L. Boyman, Voltage-energized calcium-sensitive ATP  
585 production by mitochondria. *Nature Metabolism* **1**, 975-984 (2019).
- 586 67. M. S. Bertolini, M. A. Chiurillo, N. Lander, A. E. Vercesi, R. Docampo, MICU1 and MICU2 Play an  
587 Essential Role in Mitochondrial Ca(2+) Uptake, Growth, and Infectivity of the Human Pathogen  
588 *Trypanosoma cruzi*. *MBio* **10**, (2019).
- 589 68. R. Tufi *et al.*, Comprehensive Genetic Characterization of Mitochondrial Ca(2+) Uniporter  
590 Components Reveals Their Different Physiological Requirements In Vivo. *Cell Rep* **27**, 1541-1550  
591 e1545 (2019).
- 592 69. F. A. Ran *et al.*, Genome engineering using the CRISPR-Cas9 system. *Nat Protoc* **8**, 2281-2308  
593 (2013).



- 594 70. G. Grynkiewicz, M. Poenie, R. Y. Tsien, A new generation of Ca<sup>2+</sup> indicators with greatly improved  
595 fluorescence properties. *J Biol Chem* **260**, 3440-3450 (1985).
- 596 71. D. A. Winter, *Biomechanics and motor control of human movement*. (Wiley, Hoboken, N.J., ed.  
597 4th, 2009), pp. xiv, 370 pages.
- 598 72. D. D. Hall, Y. Wu, F. E. Domann, D. R. Spitz, M. E. Anderson, Mitochondrial calcium uniporter  
599 activity is dispensable for MDA-MB-231 breast carcinoma cell survival. *PLoS One* **9**, e96866 (2014).
- 600 73. G. Bhosale *et al.*, Pathological consequences of MICU1 mutations on mitochondrial calcium  
601 signalling and bioenergetics. *Biochim Biophys Acta Mol Cell Res* **1864**, 1009-1017 (2017).
- 602

603 **ACKNOWLEDGEMENTS**

604 We thank Drs. Katsuyoshi Mihara (Kyushu University, Japan) and David C. Chan (Caltech,  
605 USA) for sending us *Drp1*<sup>-/-</sup> MEFs, and Dr. Toren Finkel (University of Pittsburgh, USA) for  
606 sending the MEFs with intact Drp1 (*WT* and *MICUI*<sup>-/-</sup> MEFs). We thank the Nikon Microscopy  
607 Core (DeLaine Larsen, Kari Herrington) and Lab for Cell Analysis (Sarah Elms) at UCSF for  
608 help with use of microscopy and FACS equipment. We thank all members of the Y.K. lab for  
609 helpful discussions; **Funding:** This work was supported by American Heart Association  
610 Scientist Development Grant 17SDG33660926 (V.G.) and NIH grant 5R01GM107710 (Y.K.);  
611 **Author contributions:** V.G. and Y.K. conceived the project and designed all experiments. V.G.  
612 performed all experiments. V.G. and T.U. performed Western blot experiments. J.S. consulted on  
613 Ca<sup>2+</sup> imaging experiments. I.P. helped with the analysis of Ca<sup>2+</sup> imaging experiments. L.S.M.  
614 consulted on single-channel analysis using QuB. V.G and Y.K. discussed the results and wrote  
615 the manuscript. All authors commented on the manuscript; **Competing interests:** Authors  
616 declare no competing interests; **Data and materials availability:** All data is available in the  
617 main text or the supplementary materials. Further information and requests for reagents may be  
618 directed to the lead contact Yuriy Kirichok (yuriy.kirichok@ucsf.edu).

619

620 **SUPPLEMENTARY MATERIALS**

621 Materials and Methods

622 Figure S1 – S10

623 Tables S1 – S2

624 References

625 **FIGURES**

626 **Fig. 1. MCU-mediated  $I_{Ca}$  in *WT* and knockouts of MCU complex subunits.** (A) Inward  $I_{Ca}$   
627 elicited by a voltage ramp in *WT*, *MCU*<sup>-/-</sup> and *EMRE*<sup>-/-</sup> mitoplasts exposed to  $[Ca^{2+}]_{cyto}$  of 30  $\mu$ M,  
628 100  $\mu$ M and 1 mM. In *WT*, also note an outward  $Na^+$  current via MCU at positive voltages in  
629  $Ca^{2+}$ -free bath solution (Control). Voltage protocol is indicated on the top. (B)  $I_{Ca}$  is rescued by  
630 the recombinant expression of MCU and EMRE in their respective knockout cell lines. (C)  $I_{Ca}$   
631 density measured at -160 mV at different  $[Ca^{2+}]_{cyto}$  in indicated cell lines. ( $n = 4$  to 5 each) Mean  
632  $\pm$  SEM. (D) Inward  $I_{Ca}$  in *WT*, *MICU1*<sup>-/-</sup>, *MICU2*<sup>-/-</sup> and *MICU3*<sup>-/-</sup> mitoplasts exposed to 10  $\mu$ M,  
633 100  $\mu$ M and 1 mM  $[Ca^{2+}]_{cyto}$ . (E)  $I_{Ca}$  amplitudes measured at -160 mV in mitoplasts at  $[Ca^{2+}]_{cyto}$   
634 of 10  $\mu$ M, 100  $\mu$ M and 1 mM (*upper*), as well as 5 mM and 25 mM (*lower*). ( $n = 8$  to 17) Mean  
635  $\pm$  SEM; one-way ANOVA with post-hoc Tuckey test. \*\* $p < 0.01$ ; \*\*\* $p < 0.001$ .

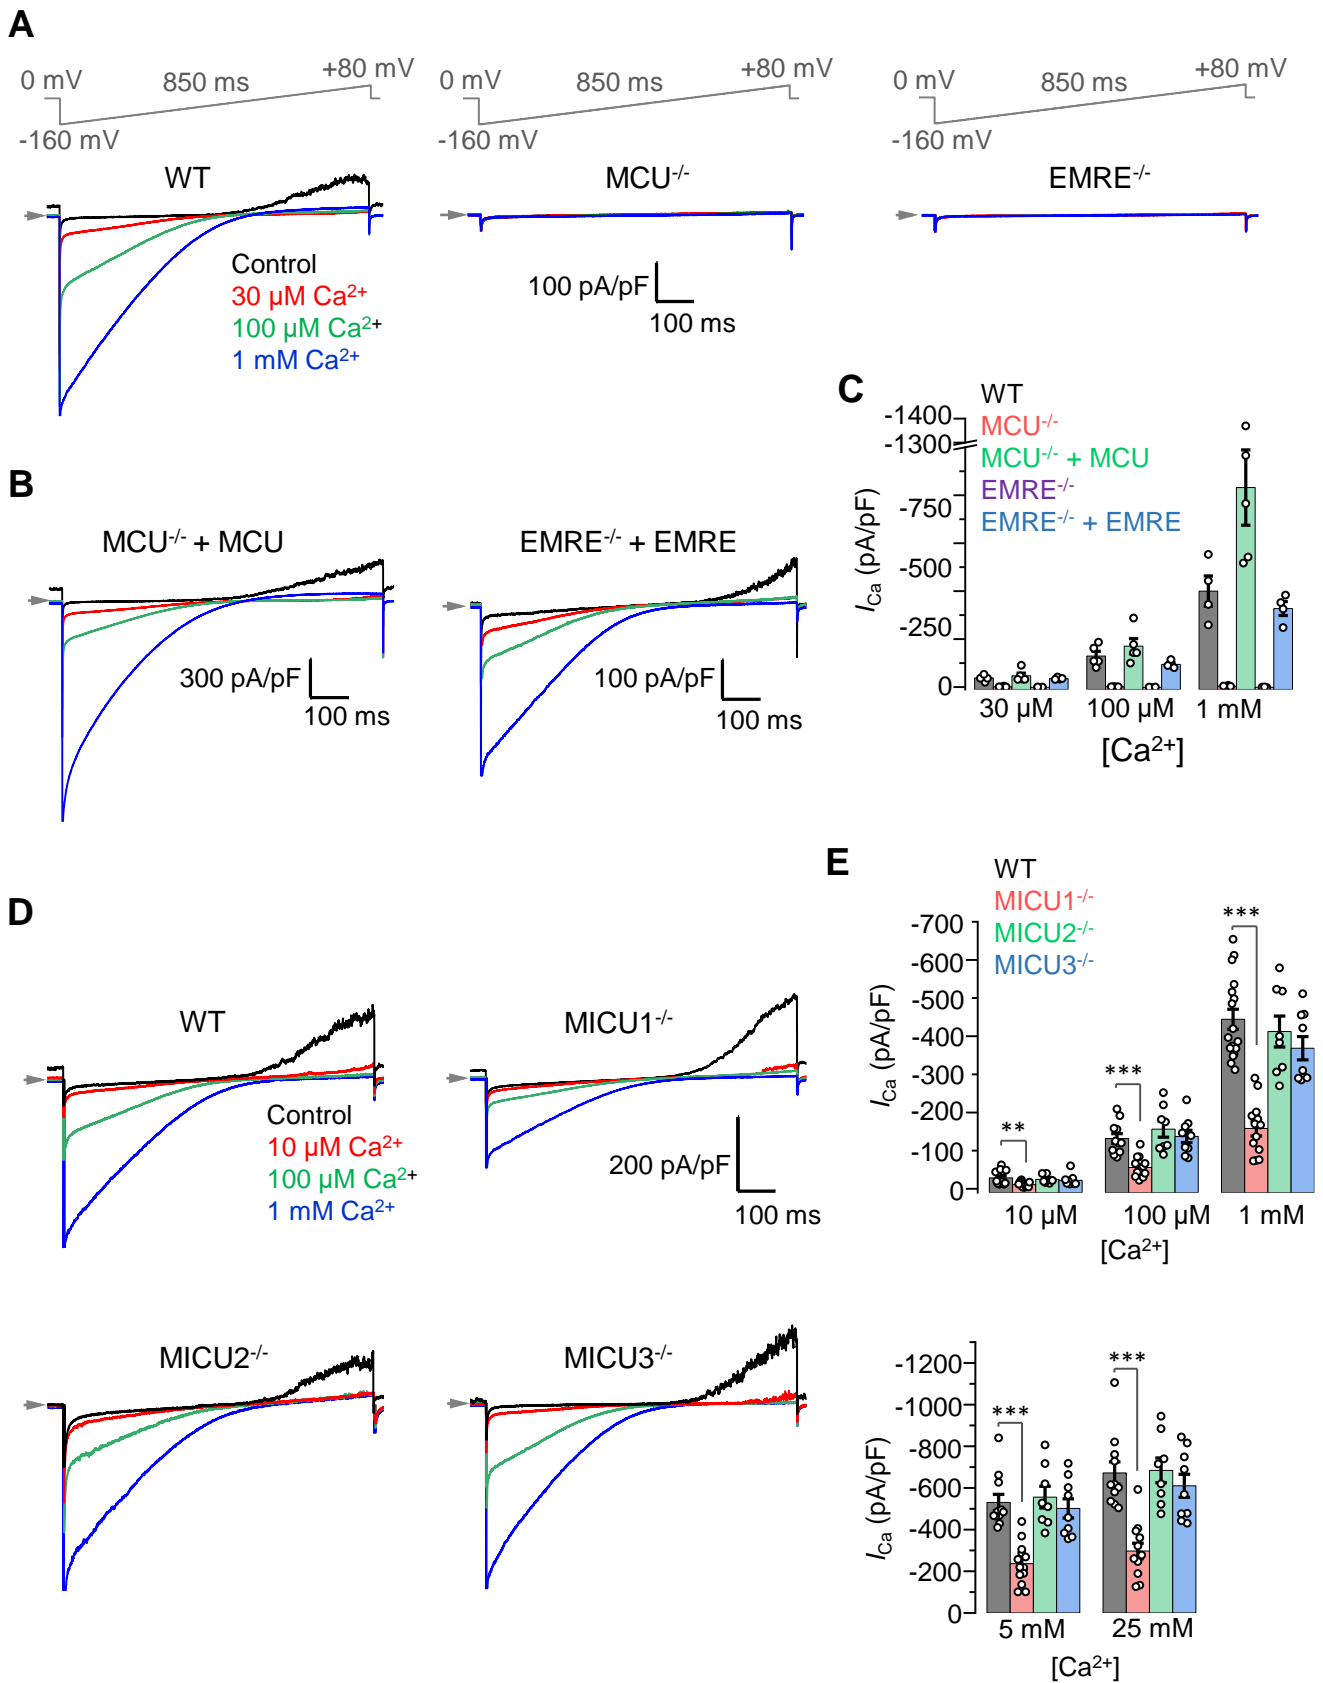

**Fig. 1**

636 **Fig. 2. MICU1 is a Ca<sup>2+</sup>-dependent MCU potentiator.** (A) Representative  $I_{Na}$  in *WT*, *MCU*<sup>-/-</sup>  
637 and *EMRE*<sup>-/-</sup> mitoplasts at 110 mM [Na<sup>+</sup>]<sub>cyto</sub>. (B)  $I_{Na}$  amplitudes measured at -80 mV in *WT* ( $n =$   
638 20), *MCU*<sup>-/-</sup> ( $n = 3$ ) and *EMRE*<sup>-/-</sup> ( $n = 3$ ) mitoplasts. (C) Representative  $I_{Ca}$  (blue) and  $I_{Na}$  (red)  
639 recorded from the same *WT* and *MICU1*<sup>-/-</sup> mitoplasts exposed to 1 mM [Ca<sup>2+</sup>]<sub>cyto</sub> or 110 mM  
640 [Na<sup>+</sup>]<sub>cyto</sub>. (D to F), Amplitudes of  $I_{Na}$  (D) and  $I_{Ca}$  (E), and the  $I_{Ca}/I_{Na}$  ratio in the same mitoplast  
641 (F) in *WT* ( $n = 27$ ) and *MICU1*<sup>-/-</sup> ( $n = 18$ ). Current were measured at -80 mV. Mean  $\pm$  SEM;  
642 unpaired t-test, two-tailed. \*\*\* $p < 0.001$ . (G) Inward  $I_{Na}$  recorded in the absence of cytosolic Ca<sup>2+</sup>  
643 (blue) and subsequently at 2 nM [Ca<sup>2+</sup>]<sub>cyto</sub> (red) in *WT* (left) and *MICU1*<sup>-/-</sup> (right) mitoplasts  
644 exposed to 110 mM [Na<sup>+</sup>]<sub>cyto</sub>. (H) Inhibition of  $I_{Na}$  by 2 nM [Ca<sup>2+</sup>]<sub>cyto</sub> in *WT* and *MICU1*<sup>-/-</sup>. Mean  $\pm$   
645 SEM; unpaired t-test, two-tailed ( $n = 4$  each).

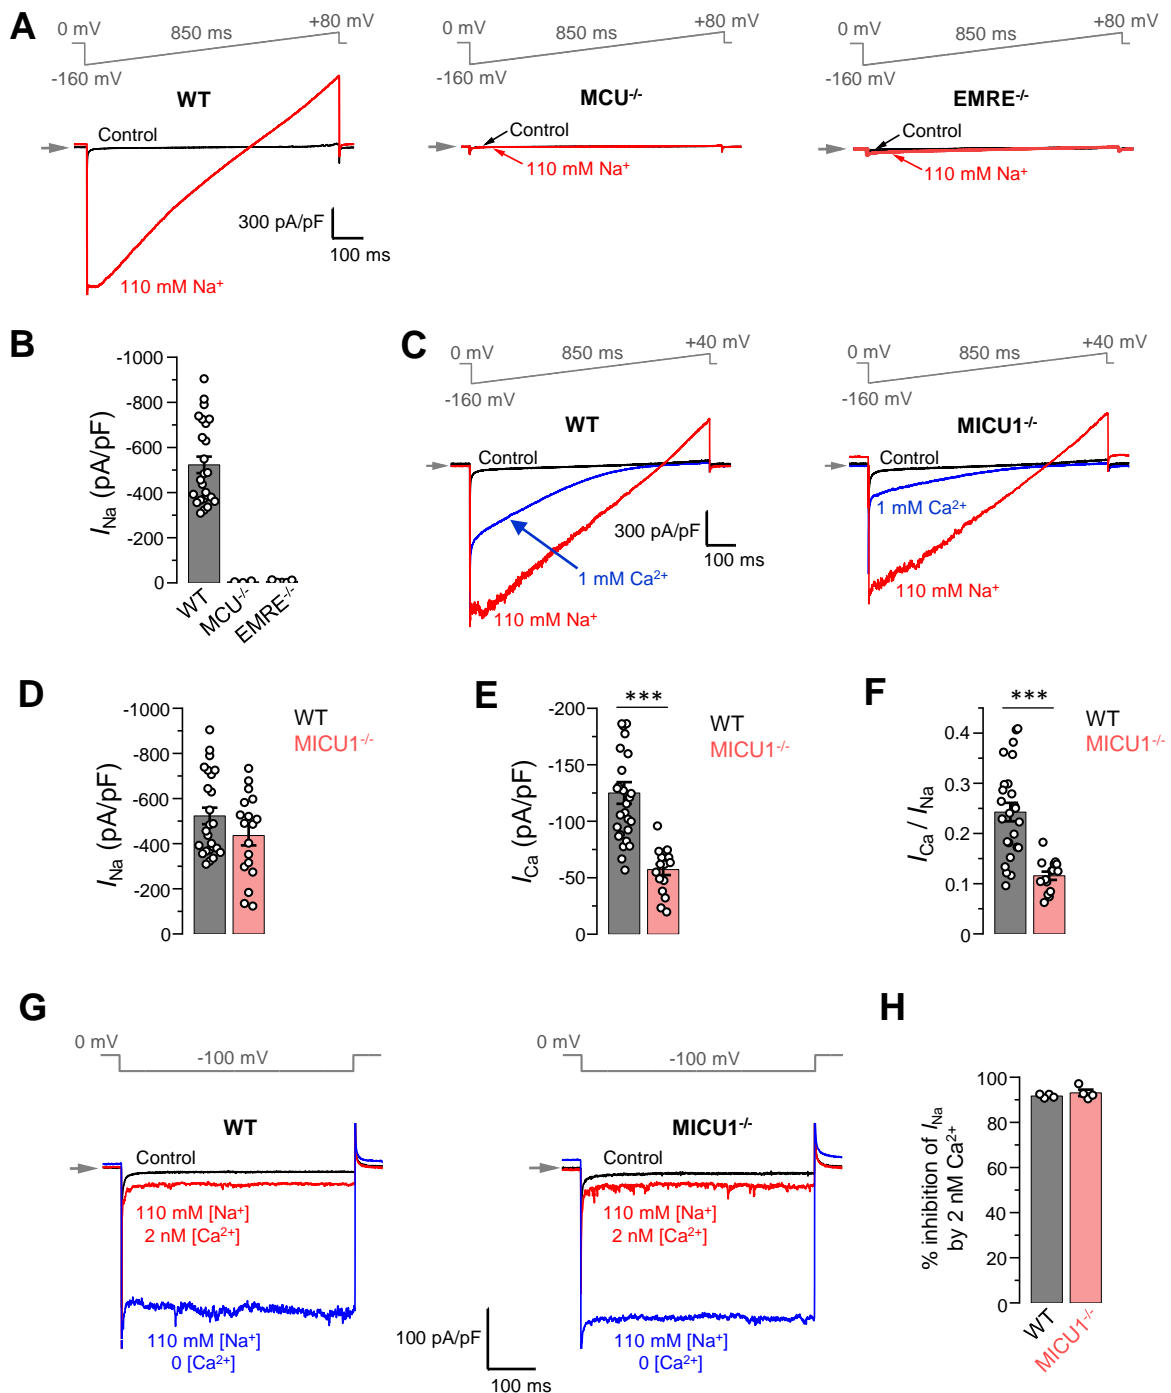

**Fig. 2**

646 **Fig. 3. Effects of MICU proteins and their EF hands on the amplitude, kinetics and**  
647 **rectification of  $I_{Ca}$ .** (A) Western blots showing overexpression of MICU  
648 proteins with non-functional EF hands (mut-EF-MICU) in their respective knockout background  
649 (left,  $MICU1^{-/-}$ ; middle,  $MICU2^{-/-}$  and; right,  $MICU3^{-/-}$ ). (B to D) Upper panels:  $I_{Ca}$  in  $MICU1^{-/-}$   
650 (B),  $MICU2^{-/-}$  (C) and  $MICU3^{-/-}$  (D) before and after overexpression of a corresponding MICU  
651 subunit or its EF hand mutant, as compared to *WT*. To simplify comparison, representative  $I_{Ca}$   
652 traces recorded from the mitoplasts of different backgrounds in 1 mM  $[Ca^{2+}]_{cyto}$  are shown  
653 together in a single panel. Lower panels: quantification of  $I_{Ca}$  amplitudes from the upper panel at  
654 -160 mV. The same *WT* and knockout data were used as in Fig. 1e. Mean  $\pm$  SEM; one-way  
655 ANOVA with post-hoc Tuckey test ( $n = 7$  to 26). \* $p < 0.05$ ; \*\* $p < 0.01$ ; \*\*\* $p < 0.001$ . (E) Left  
656 panel:  $I_{Ca}$  measured at a holding voltage of -100 mV while  $[Ca^{2+}]_{cyto}$  was rapidly ( $\tau \sim 0.4$  ms, see  
657 Methods) switched from virtual zero to 1 mM and then back to virtual zero in *WT* (grey) and  
658  $MICU1^{-/-}$  (red) mitoplasts. Right panel,  $I_{Ca}$  kinetics within  $\sim 10$  ms after the fast  $[Ca^{2+}]_{cyto}$   
659 elevation and subsequent decrease in *WT* (grey) and  $MICU1^{-/-}$  (red) mitoplasts from the left  
660 panel.  $I_{Ca}$  traces were normalized to the maximal amplitude to facilitate comparison of kinetics in  
661 *WT* and  $MICU1^{-/-}$ . (F) Left:  $I_{Ca}$  activation time constant ( $\tau_a$ ) in *WT* and  $MICU1^{-/-}$ ; Right:  $I_{Ca}$   
662 deactivation time constant ( $\tau_d$ ) in *WT* and  $MICU1^{-/-}$ . Mean  $\pm$  SEM ( $n = 3$ , each). (G)  $I_{Ca}$  at  
663  $[Ca^{2+}]_{mito} = 2$  mM and indicated  $[Ca^{2+}]_{cyto}$  in *WT* and  $MICU1^{-/-}$ . Arrows point out where the  
664 amplitude of outward  $I_{Ca}$  was measured. Bar-graph shows the amplitude of outward  $I_{Ca}$  measured  
665 at +80 mV.  $n = 3$ , each  $[Ca^{2+}]_{cyto}$ .

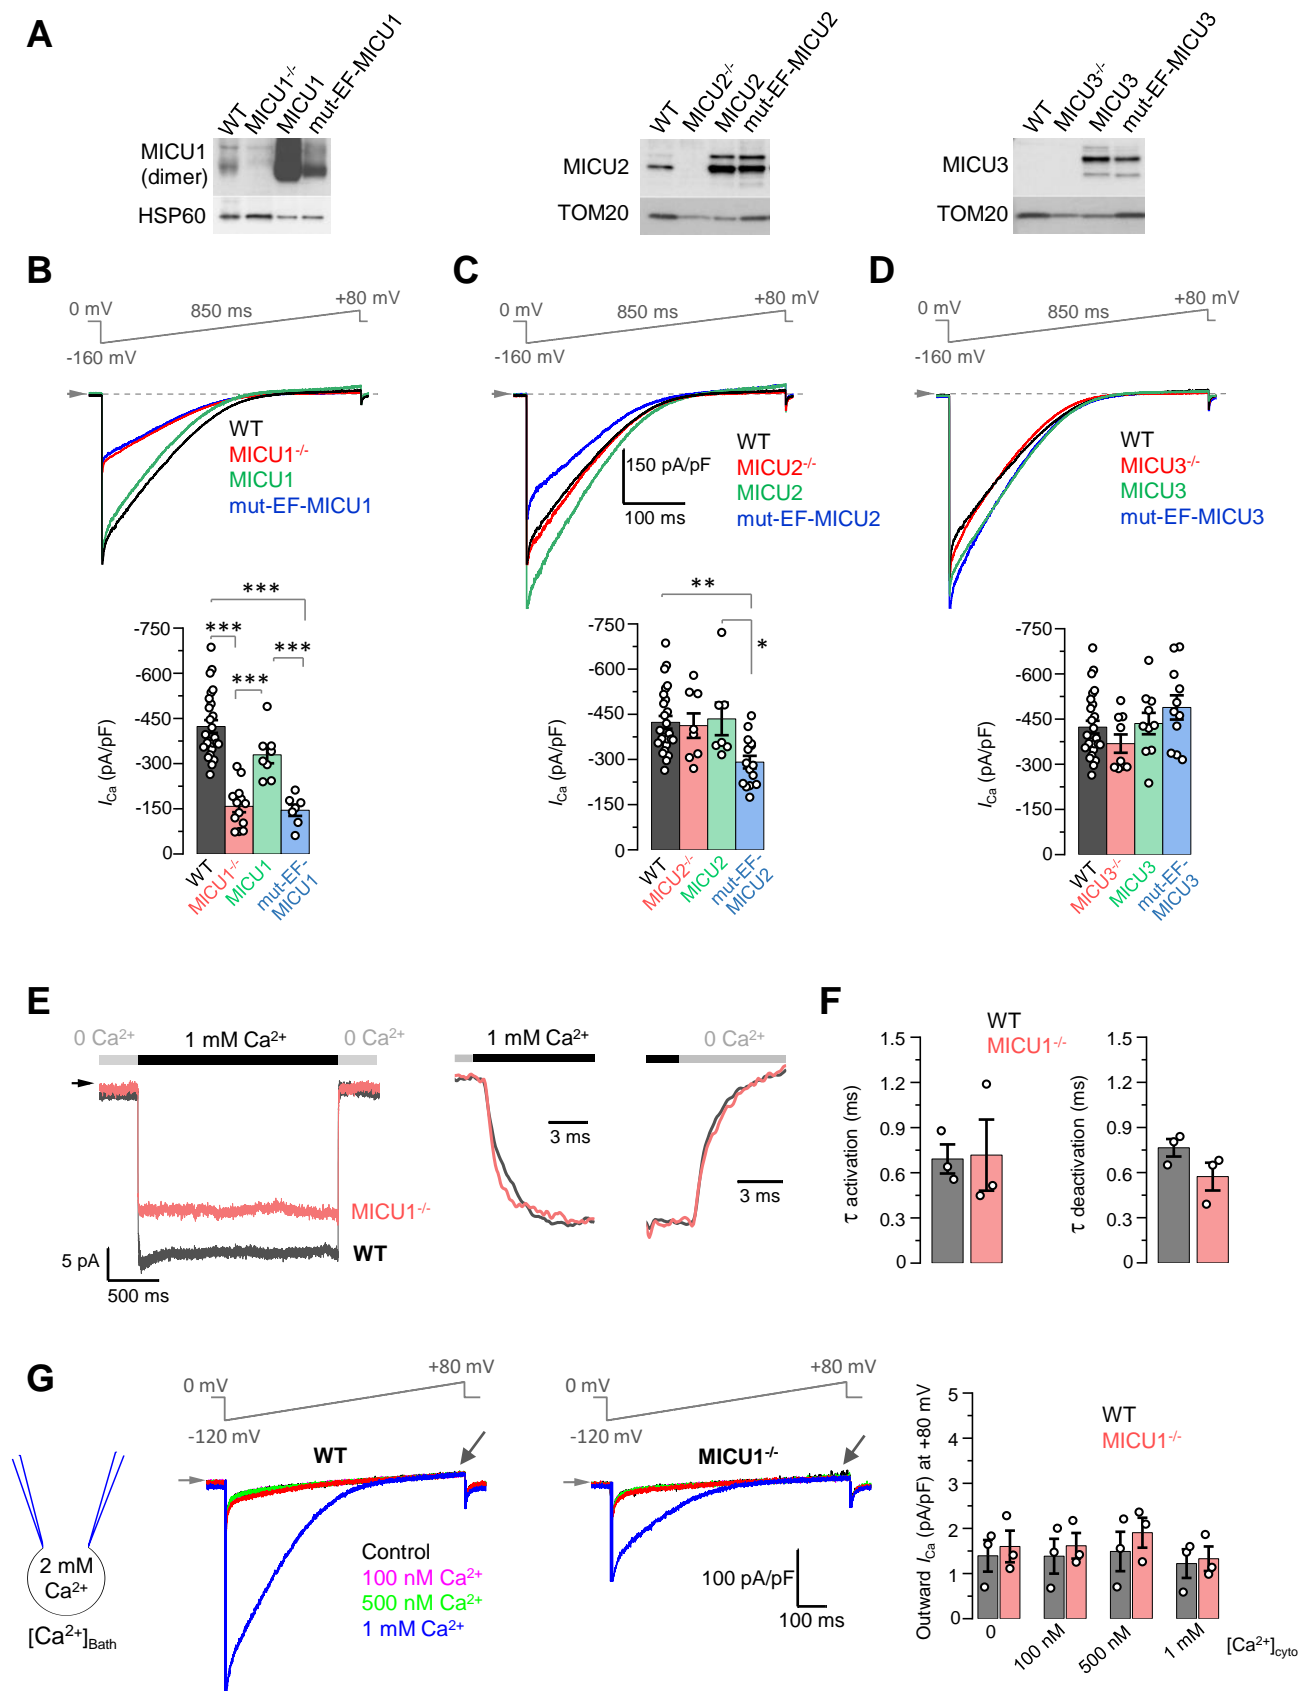

**Fig. 3**



666 **Fig. 4. Open probability of the MCU channel is decreased in *MICUI*<sup>-/-</sup>.** (A and B) MCU  
667 single-channel currents ( $i_{Ca}$ ) from inside-out IMM patches in *WT* (A) and *MICUI*<sup>-/-</sup> (B) recorded  
668 at indicated potentials in symmetrical 105 mM  $Ca^{2+}$ , and low-pass filtered at 0.3 kHz for display  
669 purposes. Arrows indicate closed state level, and downward deflections are the open state events.  
670 Multiple subconductance levels are clearly visible at -80 and -120 mV. (C to E) Single-channel  
671 amplitudes (C), open probability ( $P_o$ ) (D), and time-averaged unitary current (E) (see Methods)  
672 in *WT* and *MICUI*<sup>-/-</sup> at indicated potentials. Mean  $\pm$  SEM; unpaired t-test, two-tailed;  $n = 5-6$ ,  
673 each. \* $p < 0.05$ ; \*\* $p < 0.01$ .

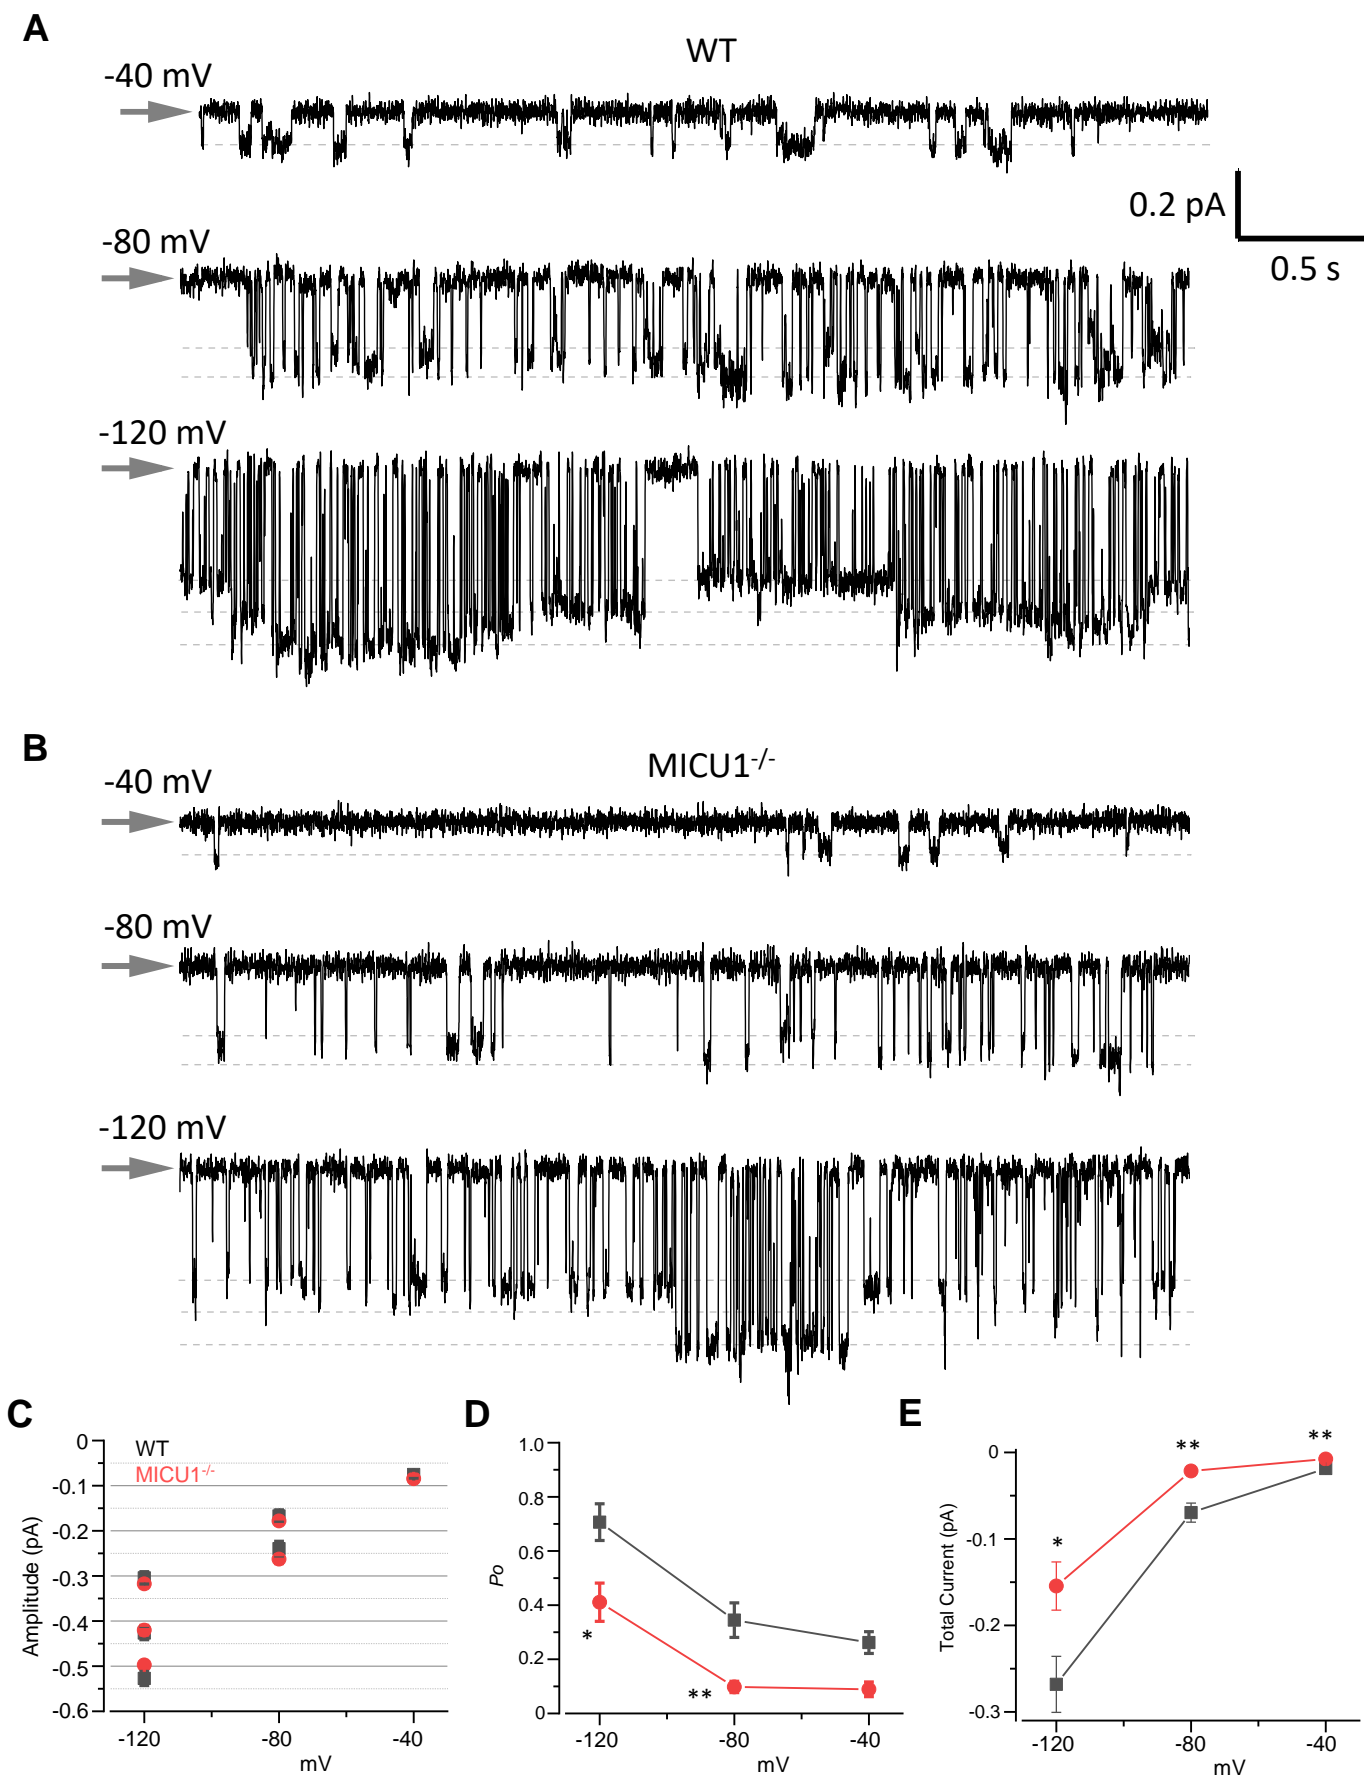

**Fig. 4**

674 **Fig. 5.  $I_{Mn}$  is reduced in  $MICUI^{-/-}$  to the similar extent as  $I_{Ca}$ .** (A to C) Representative inward  
675  $I_{Mn}$  in *WT* (A),  $MCU^{-/-}$  (B) and  $EMRE^{-/-}$  (C) mitoplasts at 5 mM  $[Mn^{2+}]_{cyto}$ . (D)  $I_{Mn}$  measured at -  
676 160 mV from *WT* ( $n = 6$ ),  $MCU^{-/-}$  ( $n = 5$ ) and  $EMRE^{-/-}$  ( $n = 3$ ) mitoplasts. Mean  $\pm$  SEM. (E)  $I_{MCU}$   
677 amplitudes at 5 mM  $[Ca^{2+}]_{cyto}$  and 5 mM  $[Mn^{2+}]_{cyto}$  in *WT* mitoplasts. Currents were measured at  
678 -160 mV. Mean  $\pm$  SEM; unpaired t-test, two-tailed;  $n = 6-14$ ;  $***p < 0.001$ . (F) Representative  
679  $I_{Ca}$  (blue,  $[Ca^{2+}]_{cyto}=1$  mM),  $I_{Mn}$  (green,  $[Mn^{2+}]_{cyto}=5$  mM) and inhibition of  $I_{Ca}$  by  $Mn^{2+}$  (red,  
680  $[Ca^{2+}]_{cyto}=1$  mM and  $[Mn^{2+}]_{cyto}=1$  mM) in *WT* and  $MICUI^{-/-}$  mitoplasts. (G to J)  $I_{Mn}$  (G),  $I_{Ca}$  (H),  
681  $I_{Mn}/I_{Ca}$  ratio (I, measured in the same mitoplasts), and inhibition of  $I_{Ca}$  by 1 mM  $[Mn^{2+}]_{cyto}$  (J) in  
682 *WT* ( $n = 3-6$ ) and  $MICUI^{-/-}$  ( $n = 5-11$ ). Mean  $\pm$  SEM; unpaired t-test, two-tailed.  $**p < 0.01$ ;  
683  $***p < 0.001$ .

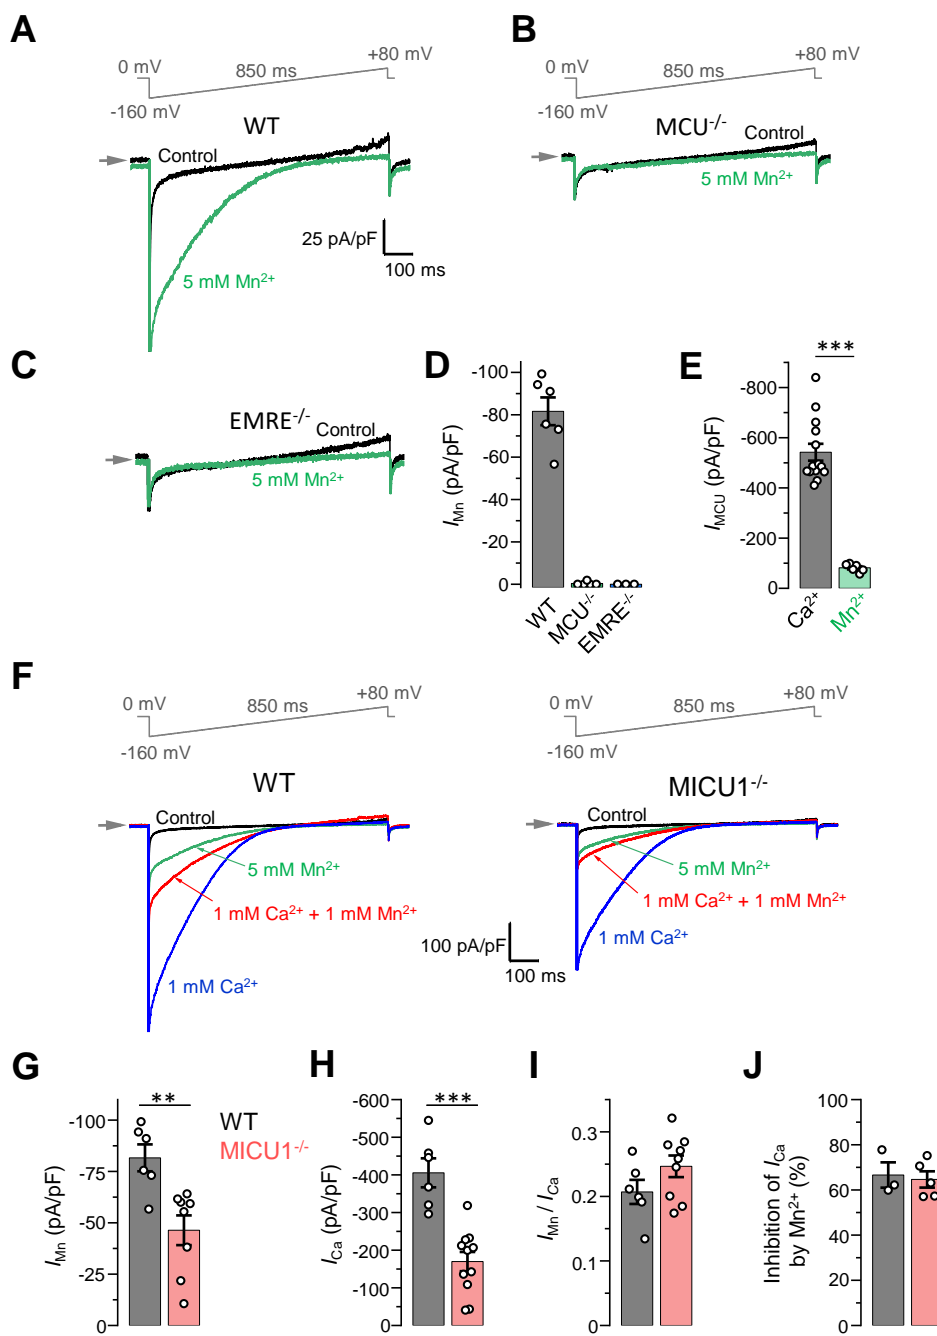

**Fig. 5**

684 **Fig. 6. Gating models of the MCU complex.** (A) Current model of the MCU complex gating  
685 and the role of MICU subunits. The MCU complex has two states: MICU-occluded and open. At  
686 low  $[Ca^{2+}]_{cyto}$ , MICU subunits occlude the MCU pore and inhibit  $Ca^{2+}$  influx. As  $[Ca^{2+}]_{cyto}$  is  
687 increased,  $Ca^{2+}$  binds to the EF hands of MICU subunits, the MICU-mediated occlusion is  
688 relieved, and the MCU pore is open. (B) New model of the MCU complex gating and the role of  
689 MICU subunits. The MCU complex is a constitutively active channel. The level of the MCU  
690 activity is determined by spontaneous transitions between the open and closed states and the  
691 equilibrium between them. At low  $[Ca^{2+}]_{cyto}$ , this equilibrium is such that the probability of the  
692 open and closed states are comparable. As  $[Ca^{2+}]_{cyto}$  is increased and  $Ca^{2+}$  binds to the EF hands  
693 of MICU subunits, MICUs strongly shift the equilibrium to the open state, which leads to a  
694 significant increase in the probability of the open state ( $P_o$ ) and a robust increase in the MCU  
695 activity.

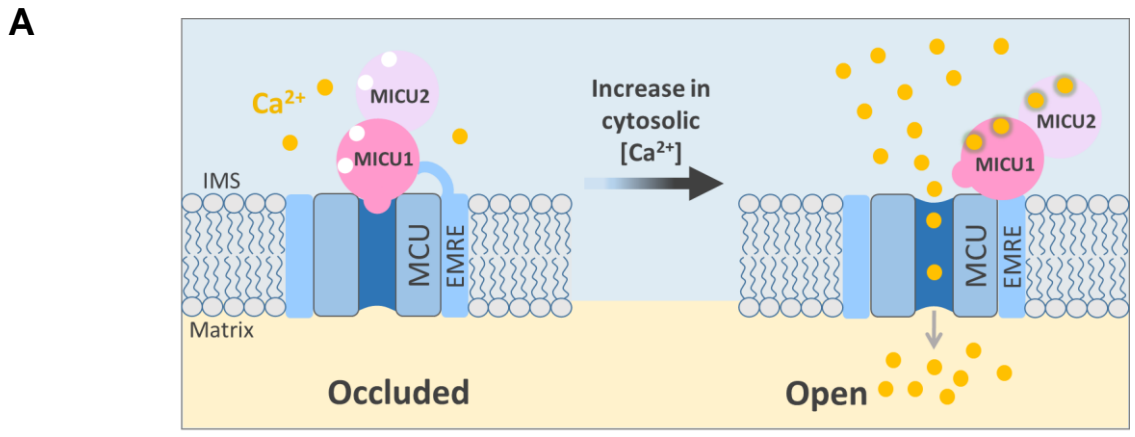

Old MCU Gating Model

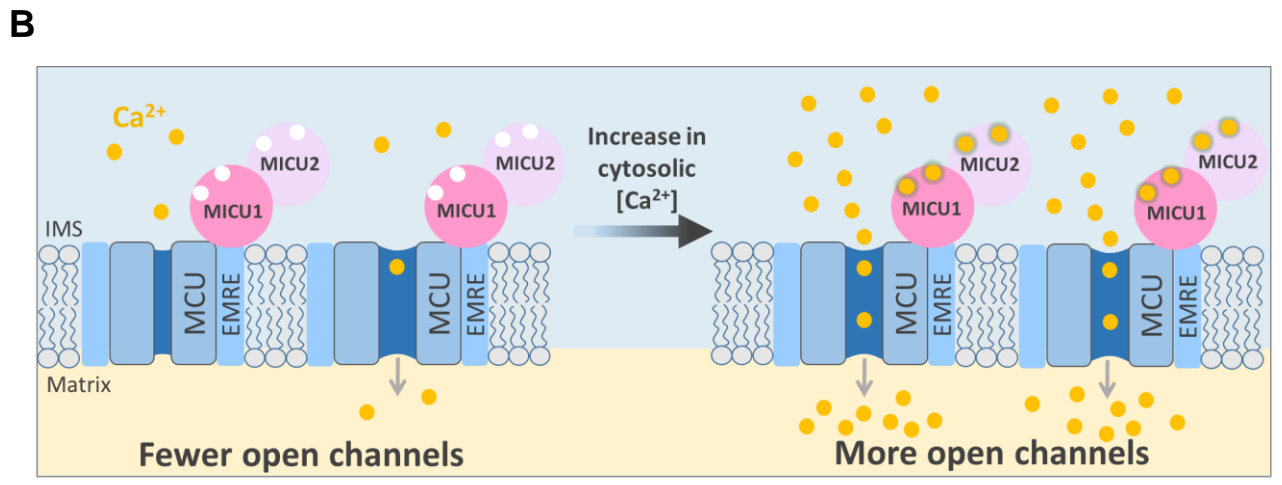

New MCU Gating Model

**Fig. 6**

696  
697  
698  
699  
700  
701  
702  
703  
704  
705  
706  
707  
708  
709  
710  
711  
712  
713  
714  
715  
716  
717  
718  
719  
720

## Supplementary Materials for

### **The Mechanism of MICU-Dependent Gating of the Mitochondrial Ca<sup>2+</sup> Uniporter**

Vivek Garg\*, Ishan Paranjpe, Tiffany Unsulangi, Junji Suzuki, Lorin S. Milesco, and Yuriy Kirichok\*.

\*Correspondence to: [yuriy.kirichok@ucsf.edu](mailto:yuriy.kirichok@ucsf.edu) (YK); [vivek.garg@ucsf.edu](mailto:vivek.garg@ucsf.edu) (VG)

#### **This PDF file includes:**

Materials and Methods  
Figs. S1 to S10  
Tables S1 to S2  
References

## 721 MATERIALS AND METHODS

722

### 723 *Cell culture and recombinant gene expression*

724 All mouse embryonic fibroblast (MEF) cells with (32) or without Drp1 (45), and all  
725 knockout clones were grown in low glucose (5.6 mM) Dulbecco's modified Eagle's medium  
726 (DMEM) supplemented with 10% FBS, 100 U/ml penicillin, and 100 U/ml streptomycin at 37°C,  
727 5% CO<sub>2</sub>. Cells were maintained by splitting every 48-72 hours at a ratio of 1:5 to 1:10.

728 We used third generation lentiviral (bi-cistronic) vectors containing the ORF for gene of  
729 interest with or without a selection marker (EGFP, mCherry or puromycin, Supplementary Fig. 1  
730 and 2). The vectors were generated by VectorBuilder, Inc. (Chicago, IL, USA), and their  
731 sequences were confirmed independently by the company and by us. Recombinant cDNA  
732 expressing cells were enriched using multiple rounds of FACS or antibiotic selection. In some  
733 cases, EGFP was targeted to mitochondria (using a mitochondrial targeting sequence from  
734 COX8) to identify mitoplasts expressing the recombinant protein of interest during patch clamp  
735 experiments.

736

### 737 *Quantitative Real-Time PCR Analysis*

738 qPCR was performed by Syd Labs (Natick, MA, USA). Total RNA was isolated from  
739 cells using the RNAeasy Minikit (QIAGEN), and reverse transcribed using the First Strand  
740 cDNA Synthesis Kit (Syd Labs). qPCR reactions were performed with the following gene-  
741 specific primers (generated by Integrated DNA Technologies):

742

|     |        |                |                               |
|-----|--------|----------------|-------------------------------|
| 743 | Hprt,  | Forward Primer | 5'-GTCCCAGCGTCGTGATTAGC-3'    |
| 744 |        | Reverse Primer | 5'-GTGATGGCCTCCCATCTCCT-3'    |
| 745 | MCU,   | Forward Primer | 5'-AAGGGCTTAGCGAGTCTTGTC-3'   |
| 746 |        | Reverse Primer | 5'-GGGTGCTGGTGTGTTAGTGT-3'    |
| 747 | MCU8,  | Forward Primer | 5'-CCACACCCCAGGTTTTATGTATG-3' |
| 748 |        | Reverse Primer | 5'-ATGGCAGAGTGAGGGTTACCA-3'   |
| 749 | EMRE,  | Forward Primer | 5'-ATTTTGCCCAAGCCGGTGAA-3'    |
| 750 |        | Reverse Primer | 5'-CCTCAAGCAGAGCAGCGAAG-3'    |
| 751 | MICU1, | Forward Primer | 5'-CTTAACACCCTTTCTGCGTTGG-3'  |
| 752 |        | Reverse Primer | 5'-AGCATCAATCTTCGTTTGGTCT-3'  |
| 753 | MICU2, | Forward Primer | 5'-CTCCGCAAACAGCGGTTTCAT-3'   |
| 754 |        | Reverse Primer | 5'-TGCCAGCTTCTTGACCAGTG-3'    |
| 755 | MICU3, | Forward Primer | 5'-GTAAGGTCAGAGCACGCAGAA-3'   |
| 756 |        | Reverse Primer | 5'-TTTCCTGTTGGACGCTGACAA-3'   |

757

758 cDNA (100 ng, calculated from initial RNA) samples were pre-amplified for 12 cycles  
759 using Absolute qPCR SYBR Green Low ROX Mix (ThermoFisher). qPCR reactions were  
760 performed using an Agilent MX3000 (Fluidigm) with 40 cycles of amplification (15 s at 95°C, 5  
761 s at 70°C, and 60 s at 60°C). Ct values were calculated by the Real-Time PCR Analysis Software  
762 (Fluidigm). Relative gene expression was determined by the  $\Delta$ Ct method. Hprt was selected as  
763 the reference gene.

764

765



## 766 **Generation of knockout cell lines by the CRISPR/Cas9 method**

767 Knockout MEF cell lines were generated using the CRISPR/Cas9 method (69). All  
768 knockouts (except the *MCU*<sup>-/-</sup> line) were generated by Alstem LLC (Richmond, CA, USA).  
769 Either one sgRNA or a pair of two adjacent sgRNAs were used to create a point indel or a  
770 truncate indel, respectively (Fig. S1).

771  
772 MCU, TGGCAGCGCTCGCGTCGAGA GGG  
773 EMRE, GAGTGTCCCGACATAGAGAA AGG  
774 CTTACACTCCCCTAGGTTA AGG  
775 MICU1, TCACTTTTAGATGCTGCCGG TGG  
776 CTGCAAGTACCGGTCTCCTG TGG  
777 MICU2, CGTTCGGGAGCCCTCGCGCG CGG  
778 GGGCGCTTCCGCAAAGATGG CGG  
779 MICU3, GGGCGAGCTGAGCATCGCGG CGG  
780 CCGGGGCCGCTAGCTCCGAG GGG

781  
782 MEFs were transfected with the Cas9 gRNA vector (Addgene: PX459) via  
783 electroporation (Invitrogen Neon transfection system) using the following parameters: 1×10<sup>6</sup>  
784 cells and 1 μg of two different gRNA-Cas9 plasmids. Puromycin was used for enrichment of  
785 transfected cells, and serial dilution was performed to select single-cell clones. A stable  
786 homozygous knockout cell line was confirmed by PCR amplification of the targeted region,  
787 cloning into a pUC19 vector, and sequencing showing that either a frameshift or large deletion  
788 had occurred in the targeted region of the gene (Fig. S1). All knockout clones were further  
789 validated by Western blotting (Fig. S2). The primers used for amplification of genomic sites and  
790 cloning into pUC19 sequencing vector were as follows:

791  
792 MCU, Forward Primer TAGAAGCTTTCCACTGCTCTGATTGATCTTG  
793 Reverse Primer ATGTGAATTCGAGCTGCTTTGGAATGAGAC  
794 EMRE, Forward Primer GTGAAGCTTGGGATCAGTAGTCCATTGGAGG  
795 Reverse Primer AGGAGAATTCAGTGAGAGTTCCTGTGGTATG  
796 MICU1, Forward Primer TTTAAGCTTGATTCCCTTTGAGTTATAAGTAG  
797 Reverse Primer CAAAGAATTCAGCAAAGAAATTCTGATGTA  
798 MICU2, Forward Primer ACCAAGCTTGAACGTCGAGGAAGCAGCCAC  
799 Reverse Primer AGGAGAATTCTCCATCCACCAGGTGGGCAG  
800 MICU3, Forward Primer CGCAAGCTTCTCGCGAGATTCGGCCCCGCC  
801 Reverse Primer AGGAGAATTCTCCATCCACCAGGTGGGCAG  
802

## 803 **Isolation of mitochondria and mitoplasts from MEFs**

804 Mitoplasts were isolated from MEFs using methodology previously described (41).  
805 Briefly, MEFs were homogenized in ice-cold medium (Initial medium) containing 250 mM  
806 sucrose, 10 mM HEPES, 1 mM EGTA, and 0.1% bovine serum albumin (BSA) (pH adjusted to  
807 7.2 with Trizma® base) using a glass grinder with six slow strokes of a Teflon pestle rotating at  
808 280 rpm. The homogenate was centrifuged at 700× g for 10 min to create a pellet of nuclei and  
809 unbroken cells. The first nuclear pellet was resuspended in the fresh Initial medium and  
810 homogenized again to increase the mitochondrial yield. Mitochondria were collected by  
811 centrifugation of the supernatant at 8,500× g for 10 min.

812 Mitoplasts were produced from mitochondria using a French press. Mitochondria were  
813 suspended in a hypertonic solution containing 140 mM sucrose, 440 mM D-mannitol, 5 mM  
814 HEPES, and 1 mM EGTA (pH adjusted to 7.2 with Trizma® base) and then subjected to a  
815 French press at 1,200–2,000 psi to rupture the outer membrane. Mitoplasts were pelleted at  
816  $10,500\times g$  for 15 min and resuspended for storage in 0.5–1 ml of solution containing 750 mM  
817 KCl, 100 mM HEPES, and 1 mM EGTA (pH adjusted to 7.2 with Trizma® base). Mitoplasts  
818 prepared and stored with this method contained the same amount of auxiliary MICU1 and  
819 MICU2 subunits as compared to intact mitochondria (Fig. S4a, see the co-immunoprecipitation  
820 section below).

821 Mitochondria and mitoplasts were prepared at 0–4 °C and stored on ice for up to 5 h.  
822 Immediately before the electrophysiological experiments, 15–50  $\mu$ l of the mitoplast suspension  
823 was added to 500  $\mu$ l solution containing 150 mM KCl, 10 mM HEPES, and 1 mM EGTA (pH  
824 adjusted to 7.0 with Trizma® base) plating on 5-mm coverslips pretreated with 0.1% gelatin to  
825 reduce mitoplast adhesion.

826

### 827 *Patch-clamp recording*

828 Whole mitoplast currents were measured as described previously (41). Gigaohm seals  
829 with mitoplasts were formed in the bath solution containing 150 mM KCl, 10 mM HEPES and 1  
830 mM EGTA, pH 7.2 (adjusted with KOH). Voltage steps of 350–500 mV for 2–8 ms were applied  
831 to rupture the IMM and obtain the whole-mitoplast configuration. Typically, pipettes had  
832 resistances of 20–40 M $\Omega$ , and the access resistance was 35–65 M $\Omega$ . The membrane capacitances  
833 of mitoplasts range from 0.2 – 0.6 pF.

834 All indicated voltages are on the matrix side of the IMM (pipette solution), relative to the  
835 cytosolic side (bath solution, Fig. S3) (41). Currents were normally induced by a voltage ramp  
836 from -160 mV to +80 mV (interval between pulses was 5 s) to cover all physiological voltages  
837 across the IMM, but other voltage protocols were also used as indicated in the figures. All  
838 whole-IMM recordings were performed under continuous perfusion of the bath solution.  
839 Currents were normalized per membrane capacitance to obtain current densities (pA/pF).  
840 Currents flowing into mitochondria are shown as negative, while those flowing out are positive.  
841 Membrane capacitance transients observed upon application of voltage steps were removed from  
842 current traces.

843 Typically, pipettes were filled with one of the following three solutions (41) (tonicity was  
844 adjusted to ~350 mmol/kg with sucrose.):

845 *Solution A* was used to measure  $I_{Ca}$  and contained: 110 mM Na-gluconate, 40 mM HEPES, 10  
846 mM EGTA and 2 mM MgCl<sub>2</sub> (pH 7.0 with NaOH)

847 *Solution B* was used to measure  $I_{Na}$  or  $I_{Mn}$  and contained: 110 Na-gluconate, 40 HEPES, 1 EGTA,  
848 5 EDTA and 2 mM NaCl (pH 7.0 with Tris base).

849 *Solution C* was used to measure outward  $I_{Ca}$  (the MCU rectification experiments) and contained:  
850 130 mM tetramethylammonium hydroxide (TMA), 100 mM HEPES and 2 mM CaCl<sub>2</sub> (pH 7.0  
851 with D-gluconic acid)

852 To measure whole-mitoplast  $I_{Ca}$ , the bath solution was formulated to contain only 150  
853 mM HEPES (pH 7.0 with Tris base, tonicity ~300 mmol/kg with sucrose) and different dilutions  
854 of CaCl<sub>2</sub> from a 1 M stock (Sigma)(9). The control solution contained: 150 mM HEPES, 80 mM  
855 sucrose and 1 mM EGTA (pH 7.0 with Tris base, tonicity ~300 mmol/kg with sucrose). The  
856 bath solution used for measuring  $I_{Na}$  contained: 110 mM Na-gluconate, 40 mM HEPES, 1 mM  
857 EGTA and 5 mM EDTA (pH 7.0 with Tris base, tonicity ~300 mmol/kg with sucrose). The bath

858 solution for measuring inhibition of  $I_{Na}$  by cytosolic  $Ca^{2+}$  contained: 110 mM Na-gluconate, 40  
859 mM HEPES and 10 mM EDTA (pH 8.0 with Tris, tonicity  $\sim$ 380 mmol/kg with sucrose)) and  
860 varying amounts of  $CaCl_2$  were added to the bath solution to achieve the free  $[Ca^{2+}]$  calculated  
861 using the MaxChelator program (C. Patton, Stanford University).

862 A rapid exchange of  $[Ca^{2+}]_{cyto}$  from virtual zero (control solution) to 1 mM was achieved  
863 using a commercially available piezo-driven, fast solution exchange system (Warner  
864 Instruments, SF-77B perfusion fast step system). It was interfaced with our pClamp acquisition  
865 software in order to precisely time the steps during solution change. The timing ( $\tau \sim$ 0.4 ms) for  
866 solution exchange was judged by the current changes because of a junction potential difference  
867 using solutions with different ionic strengths.

868 Currents were recorded using an Axopatch 200B amplifier (Molecular Devices). Data  
869 acquisition and analyses were performed using PClamp 10 (Molecular Devices) and Origin 9.6  
870 (OriginLab). All data were acquired at 10 kHz and filtered at 1 kHz.

871

### 872 *Single-channel recordings and analysis*

873 All single-channel data were acquired from inside-out patches excised from isolated  
874 mitoplasts(9). Patches were excised in a bath solution containing 150 mM KCl, 10 mM HEPES  
875 and 1 mM EGTA, pH 7.2 (adjusted with KOH). Recordings were performed under symmetrical  
876 conditions (the same bath and pipette solutions): 105 mM  $CaCl_2$  and 40 mM HEPES, pH 7.0  
877 with Tris base. Signals were sampled at 50 kHz and low-pass filtered at 1 kHz. Fire-polished,  
878 borosilicate pipettes (Sutter QF-150-75) coated with Silguard (Dow Corning Corp., Midland,  
879 MI) and having a tip resistance of 50–70 M $\Omega$  were used for low noise recordings.

880 To characterize the single-channel conductance and subconductance levels and their  
881 occupancy probabilities, we used the MLab version of the QuB software, freely available from  
882 the Milesco lab at: [https://milescolabs.biology.missouri.edu/QuB\\_Downloads.html](https://milescolabs.biology.missouri.edu/QuB_Downloads.html). The data  
883 were first resampled at 2.5 kHz and then were idealized with the Baum-Welch and Viterbi  
884 algorithms, as implemented in QuB, which classify each point in the data to a conductance level  
885 and produce estimates of current amplitudes and occupancy probabilities. The time-averaged  
886 single-channel current can be calculated as the product between occupancy probability and  
887 current amplitude, summated over all conductance levels (main open state and substates).

888

### 889 *Time-lapse $Ca^{2+}$ imaging*

890 For imaging experiments, MEFs were plated on collagen type-I-coated glass-bottom 35  
891 mm dishes (P35G-1.5-14-C, Matek), 48–72 h before imaging. Cells were imaged at the interval  
892 of 3 s on a Nikon Ti-E microscope using a 40 $\times$  objective (NA 1.30, oil, CFI Plan Fluor, Nikon),  
893 Lambda 421 LED light source (Sutter) and ORCA Flash 4.0 CMOS camera (Hamamatsu  
894 Photonics) at room temperature (25 $^{\circ}$ C). The following excitation/emission filter settings were  
895 used: 340 $\pm$ 13 nm/525 $\pm$ 25 and 389 $\pm$ 19 nm/510 $\pm$ 40 for cytosolic  $Ca^{2+}$  imaging using fura-2  
896 ( $K_d=224$  nM) and 480 $\pm$ 40 nm/525 $\pm$ 15 nm for mitochondrially targeted *cepia2* (*CEPIA2mt*,  
897  $K_d=160$  nM (46), cloned into a lentiviral vector). Cells were loaded with 3  $\mu$ M fura-2 AM (Life  
898 Tech., USA) in DMEM/FBS at room temperature for 30 min. After three washes with  
899 physiological salt solution (PSS) containing (in mM) 150 NaCl, 4 KCl, 2  $CaCl_2$ , 1  $MgCl_2$ , 5.6  
900 glucose and 25 HEPES (pH 7.4), each dish was placed on the stage for imaging. Imaging was  
901 performed in PSS within 1 h of dye staining. Baseline fluorescence was taken for 1–2 min after  
902 which thapsigargin (Tg) (final [Tg] = 300 nM) was added while imaging was continued for  
903 another 10–15 min.

904 *Fura-2 Calibration:* Baseline measurements were taken, and cells were incubated in PSS  
905 (No CaCl<sub>2</sub>) containing 3 mM EGTA, 1 μM ionomycin and 1 μM Tg for 5–10 min. After 2–3  
906 washes with PSS (No CaCl<sub>2</sub>) containing 0.3 mM EGTA, cells were imaged for 5 min (average of  
907 last 10 frames was used for calculation) to obtain the R<sub>min</sub> and F<sub>380max</sub> values. Finally, PSS  
908 containing 10 mM CaCl<sub>2</sub> (no EGTA), 1 μM ionomycin and 1 μM Tg was added and cells were  
909 imaged for 10 min. After the signal reached saturation (~3 min), the average value from 10  
910 frames was used to calculate R<sub>max</sub> and F<sub>380min</sub> values. Using these obtained values, the fura-2  
911 ratio was calibrated by the following equation (70):

$$912 \quad [Ca^{2+}]_{free} = K_d * \left( \frac{[R - R_{min}]}{[R_{max} - R]} \right) * (F_{380max}/F_{380min})$$

913 All image analyses were done with ImageJ (NIH). Briefly, mitochondrial and cytosolic  
914 regions were manually determined for each cell. The average fluorescence intensity in the  
915 regions was measured and the background intensity was subtracted. For analysis of the *cepia2*  
916 signal, we normalized the fluorescence intensity by the baseline fluorescence. For analysis of the  
917 fura-2 signal, we calculated the fluorescence ratio (F<sub>340</sub>/F<sub>380</sub> for fura-2).

918 The time point for increase in mitochondrial [Ca<sup>2+</sup>] (upstroke) was detected using a script  
919 written in Python (<https://github.com/ishanparanjpe/upstroke>) and manually checked afterwards.  
920 Briefly, the fluorescence signal was smoothed by applying a second-order zero phase digital  
921 Butterworth filter with an optimal cutoff frequency as previously described (71). From the  
922 smoothed signal, the upstroke frame was defined as the earliest point between the baseline and  
923 signal peak that was greater than 80% of the maximal time derivative. The time-point for change  
924 in mitochondrial signal was time-matched with the fura-2 reading to determine the threshold  
925 [Ca<sup>2+</sup>]<sub>cyto</sub>.

926

### 927 ***Co-immunoprecipitation***

928 Mitochondria or mitoplasts were isolated from MEFs deficient in the MCU subunit but  
929 stably expressing Flag-tagged MCU. Mitochondrial fraction from wild type cells (without MCU-  
930 FLAG) was used as negative control. Isolated mitoplasts (but not mitochondria) were incubated  
931 in 750 mM KCl for 30 min before solubilization. Briefly, 300 μg of protein lysate was  
932 solubilized with 500 μl of lysis buffer (50 mM HEPES pH 7.4, 150 mM NaCl, 1 mM EGTA,  
933 0.2% DDM and Halt protease inhibitor cocktail [Thermo Fisher]) for 30 min at 4°C. Lysates  
934 were cleared by spinning at 20,000× g for 10 min at 4°C. Cleared lysates were incubated with  
935 anti-Flag M2 affinity gel (Sigma A2220) for 2 h at 4°C. Immunoprecipitates were washed with 1  
936 ml of lysis buffer three times and boiled in 20 μl of Laemmli buffer (without β-mercaptoethanol).  
937 One-third of the immunoprecipitate was loaded onto a 4–20% gradient SDS-PAGE gel for  
938 detection of the indicated proteins by Western blotting. Flow-through fraction was also collected  
939 and analyzed in the same gel.

940

### 941 ***Immunoblots***

942 For Western blot analysis, MEFs or isolated mitochondria/mitoplasts were lysed in  
943 radioimmunoprecipitation assay (RIPA) buffer (1% IGEPAL<sup>®</sup>, 0.1% sodium dodecyl sulfate,  
944 0.5% sodium deoxycholate, 150 mM NaCl, 1 mM EDTA, 50 mM Tris-HCl (pH 7.4) and a  
945 cocktail of proteases inhibitors). Lysates were resolved by SDS-PAGE; transferred to PVDF  
946 membrane (Millipore); and probed with anti-MCU (Sigma, HPA016480, 1:2,000), anti-EMRE  
947 (Santa Cruz, sc-86337, 1:200), anti-HSP60 (Santa Cruz, sc-1052, 1:3,000), anti-VDAC (Abcam,  
948 ab15895, 1:2,000), anti-MICU1 (Cell Signaling Technology, 12524S, 1:2,000), anti-MICU2  
949 (Bethyl, A300-BL19212, 1:500), anti-MICU3 (Sigma, HPA024779, 1:1,000) and anti-TOM20

950 (Santa Cruz, sc-11415, 1:2,000). Anti-MICU1 antibody produced a non-specific band near its  
951 monomeric molecular weight (~50 kDa), so samples were prepared in Laemmli buffer without  $\beta$ -  
952 mercaptoethanol to detect MICU1 homo- or hetero-dimers (~100 kDa).

953

#### 954 *Statistical analysis*

955 Data are presented as mean  $\pm$  standard error of the mean (SEM), as specified in the figure  
956 legend. Statistical analysis was completed in Excel or Origin 9.6. All experiments were  
957 performed in triplicate or more. Statistical significance at an exact *p-value* was determined with  
958 the methods as indicated in the corresponding figure legends.

959 **SUPPLEMENTARY FIGURES**

960

961 **Fig. S1. Generation of knockouts for various MCU complex subunits.** (A) A schematic  
962 arrangement of various subunits in the MCU complex. Four MCU and four EMRE subunits form  
963 the pore of the MCU complex (only two MCU and two EMRE subunits are shown for  
964 simplicity). EMRE also tethers MICU1 subunit to the pore on the cytosolic side of the IMM (i.e.,  
965 in the mitochondrial intermembrane space, IMS). MICU1 forms homodimers or hetero-dimerizes  
966 with MICU2 or MICU3 (not shown). Each MICU subunit has two EF hands that bind cytosolic  
967  $\text{Ca}^{2+}$ . (B to F) CRISPR-mediated indels in various MCU subunit genes and the resulting mutant  
968 alleles. The CRISPR binding sites (for sgRNA) are highlighted in *yellow*, and their PAM  
969 sequences are highlighted in *green*. The translational initiation codon (ATG) is shown in *bold*  
970 where applicable. (B) Overview of the *MCU* gene and indels in the knockout. A sgRNA was  
971 used to target exon 3. The sequence of targeted region in *MCU* gene is shown; exon 3 is  
972 underlined. Targeted sequencing indicates frame-shift indels (*red*) in both alleles (*Al-1* and *Al-2*).  
973 (C) Overview of the *EMRE* gene and truncated region in the knockout. Two sgRNAs were used  
974 for CRISPR-Cas9-mediated deletion in the exon-2 (*underlined*) and the flanking region.  
975 Targeted sequencing indicates same 259-bp deletion (*red*) in both alleles. (D) Overview of the  
976 *MICU1* gene and truncated region in the knockout. Two sgRNAs were used for CRISPR-Cas9-  
977 mediated deletion in the exon-3 (*underlined*) and the flanking region. Targeted sequencing  
978 indicates that almost all of exon-3 is deleted along with a portion of the flanking region (*red*) in  
979 both alleles (*Al-1* and *Al-2*). (E) Overview of the *MICU2* gene and truncated region in the  
980 knockout. Two sgRNAs were used for CRISPR-Cas9-mediated deletion in the exon-1  
981 (*underlined*) and the flanking region. Targeted sequencing indicates that almost all of exon-1 is  
982 deleted (*red*) in both alleles. (F) Overview of the *MICU3* gene and truncated region in the  
983 knockout. Two sgRNAs were used for CRISPR-Cas9-mediated deletion in the exon-1  
984 (*underlined*). Targeted sequencing indicates a 73-bp deletion in the expected cut area (*red*) in  
985 both alleles.



986 **Fig. S2. Expression of various MCU complex subunits and  $[Ca^{2+}]_{mito}$  phenotype in cells**  
987 **deficient for various MCU complex subunits.** (A to C) Western blots show expression of  
988 various MCU complex subunits in the respective knockout cells. For MICU1 (A), samples were  
989 prepared without reducing agent,  $\beta$ -mercaptoethanol. The MICU1 band is near the expected  
990 molecular weight ( $\sim 100$  kDa) for the homo- or hetero-dimer (with MICU2 or 3). Multiple bands  
991 were observed with anti-MICU2 (B) and anti-MICU3 (C) antibodies, which were absent in  
992 knockout cell lines. This is likely due to the presence of different oligomeric states of the protein,  
993 as well as the mature and nascent (before truncation of the mitochondrial targeting signal) forms  
994 of the protein. Arrows mark the mature (m) and nascent (n) proteins near the expected molecular  
995 weight. (D) PCR showing the mRNA expression of various MCU subunits in *Drp1*<sup>-/-</sup> MEFs. Hprt  
996 was used as the reference. (E to J) Representative  $[Ca^{2+}]_{mito}$  (*black*, left ordinate) and  $[Ca^{2+}]_{cyto}$   
997 (*blue*, right ordinate) in an individual cell with *WT* MCU complex, and individual cells with  
998 MCU, EMRE, and MICU1–3 knockouts before and after application of 300 nM Tg (arrow).  
999 Dashed red lines indicate the  $[Ca^{2+}]_{cyto}$  at which the  $[Ca^{2+}]_{mito}$  starts to increase (“ $[Ca^{2+}]_{cyto}$   
1000 threshold”). (K to M) Resting  $[Ca^{2+}]_{cyto}$  (K), peak  $[Ca^{2+}]_{cyto}$  after addition of Tg (L), and  
1001  $[Ca^{2+}]_{cyto}$  threshold for  $[Ca^{2+}]_{mito}$  elevation (M) in *WT* and indicated knockout cell lines. *WT* (*n* =  
1002 5 dishes, total cells = 150); *MCU*<sup>-/-</sup> (*n* = 3 dishes, total cells = 183); *EMRE*<sup>-/-</sup> (*n* = 4 dishes, total  
1003 cells = 187); *MICU1*<sup>-/-</sup> (*n* = 4 dishes, total cells = 196); *MICU2*<sup>-/-</sup> (*n* = 4 dishes, total cells = 192);  
1004 and *MICU3*<sup>-/-</sup> (*n* = 3 dishes, total cells = 115). Mean  $\pm$  SEM; one-way ANOVA with post-hoc  
1005 Tukey test. \**p* < 0.05; \*\*\**p* < 0.001. Statistics was run on number of dishes.



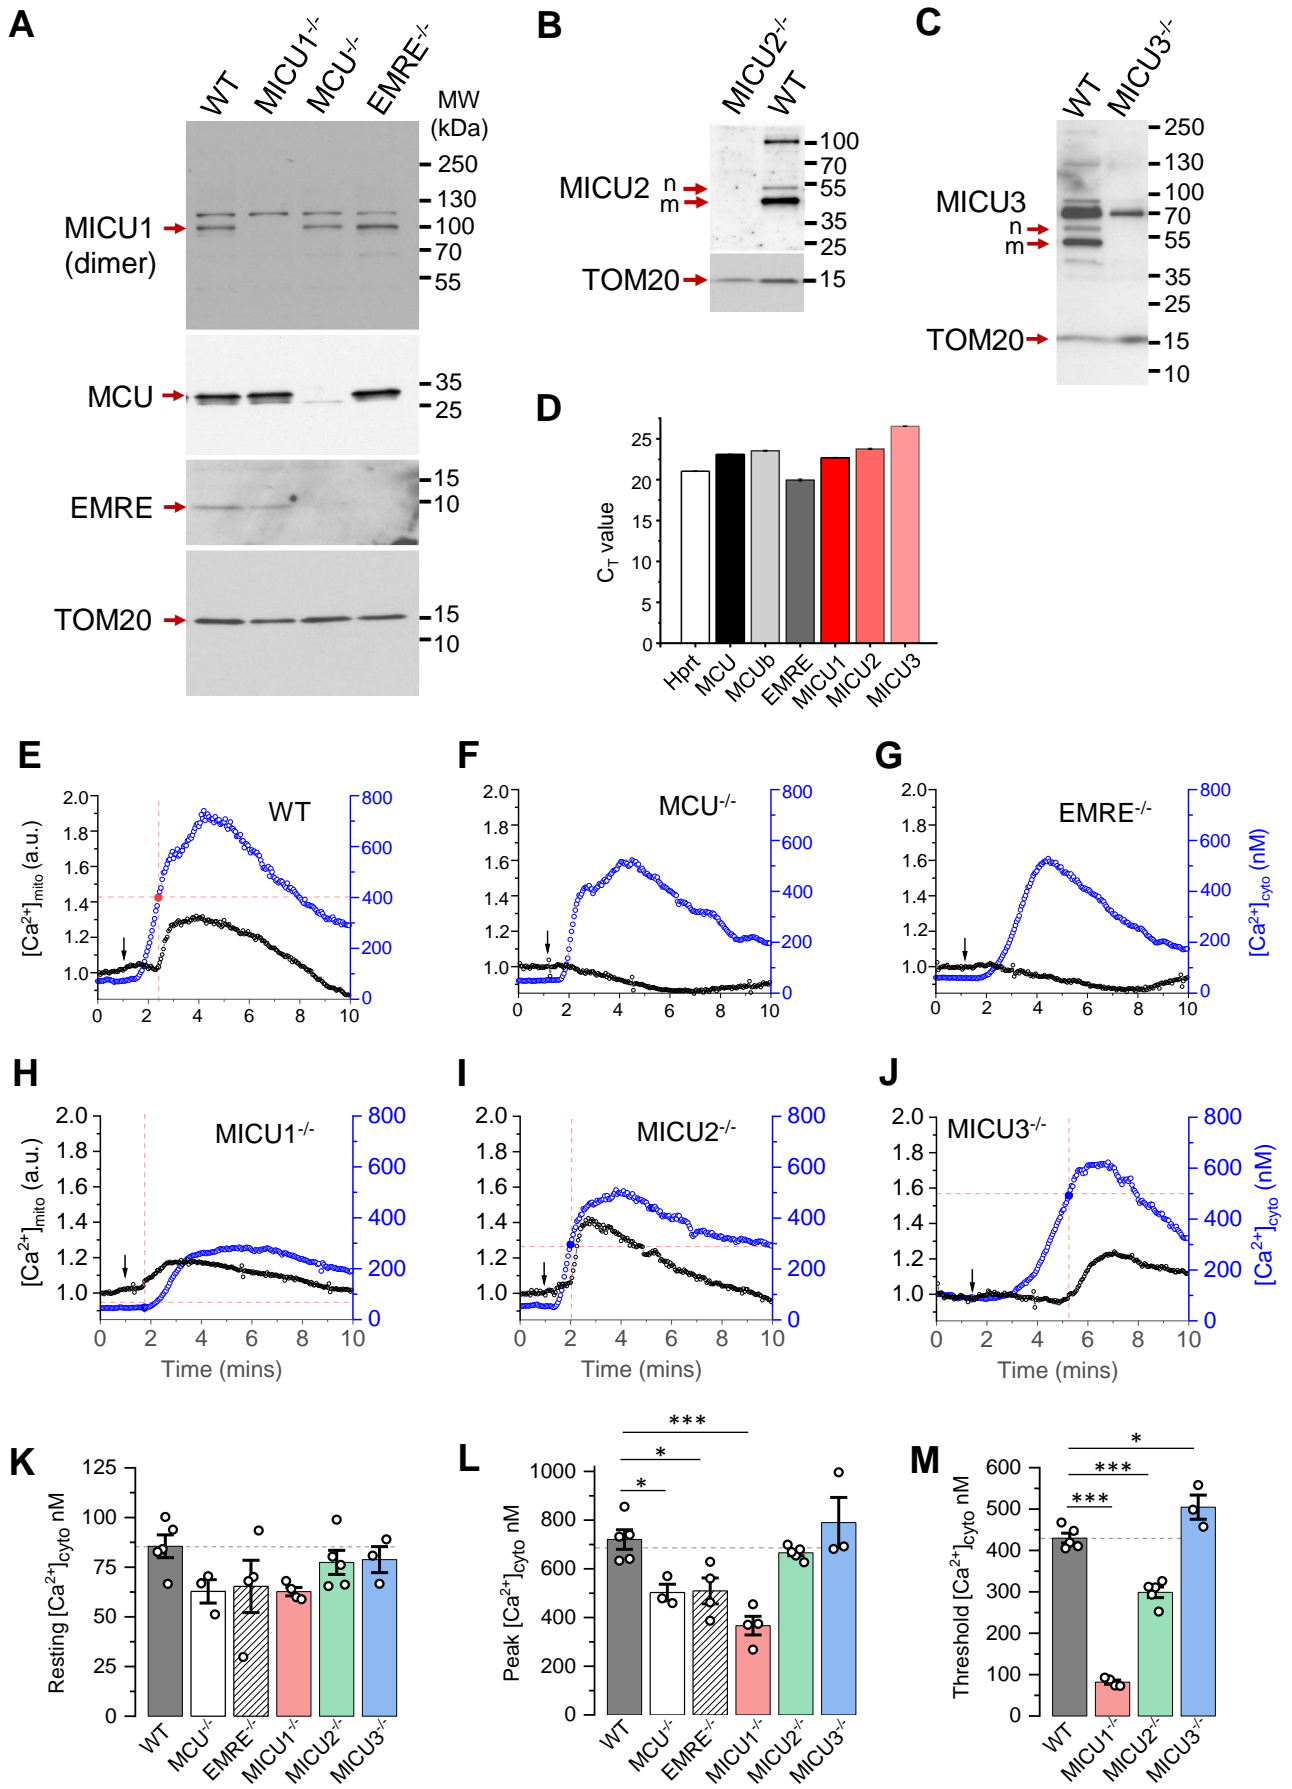

**Fig. S2**

1006 **Fig. S3. Recording MCU currents across the whole IMM.** (A) Diagram of patch-clamp  
1007 recording from a vesicle of the whole IMM (mitoplast). After formation of a gigaohm seal  
1008 between the patch pipette and the mitoplast, the IMM patch under the pipette is broken by  
1009 applying short pulses of high voltage (200–500 mV, 2–8 ms), sometimes combined with light  
1010 suction, to gain access into the mitoplast through the pipette. In this configuration, called the  
1011 “whole-IMM” configuration, the interior of the mitoplast (mitochondrial matrix) is perfused with  
1012 the pipette solution. The bath is also perfused to control the experimental solution on the  
1013 cytosolic side of the IMM. The voltage across the IMM is set to the desired value (V), and the  
1014 currents (I) are measured using the patch-clamp amplifier. Directions of currents flowing across  
1015 the IMM: inward currents (flowing into the mitoplast) are negative, while outward currents are  
1016 positive. (B) *Left panel:* Example MCU current traces recorded in the whole-IMM configuration.  
1017 The voltage protocol used to elicit the currents is shown above. All indicated voltages are within  
1018 the mitochondrial matrix relative to the bath (cytosol). The voltage of the bath solution is defined  
1019 to be zero. The zero current level is shown by the dashed line and an arrow. The directions of the  
1020 currents are indicated as negative (inward) and positive (outward). The MCU current in Ca<sup>2+</sup>-free  
1021 bath solution (control) is shown in *grey*. The outward current in control is mediated by Na<sup>+</sup> ions  
1022 permeating through the MCU channel in the Ca<sup>2+</sup>-free conditions ( $I_{Na}$ , pipette solution contains  
1023 Na<sup>+</sup>). After application of 1 mM Ca<sup>2+</sup> on the cytosolic face of the IMM (bath), we observe an  
1024 inward Ca<sup>2+</sup> current ( $I_{Ca}$ , *blue*) via MCU, while the outward  $I_{Na}$  is simultaneously inhibited. *Right*  
1025 *panel,* When [Ca<sup>2+</sup>]<sub>cyto</sub> is brought to virtual zero (1 mM EGTA and 5 mM EDTA) under  
1026 conditions when both bath and pipette solution contain Na<sup>+</sup>, we observe  $I_{Na}$  via MCU (*red*) in  
1027 both inward and outward directions. The current amplitude and time calibration bars are  
1028 indicated. The current amplitude is normalized per membrane capacitance to facilitate  
1029 comparison of current amplitudes between mitoplasts of different sizes.

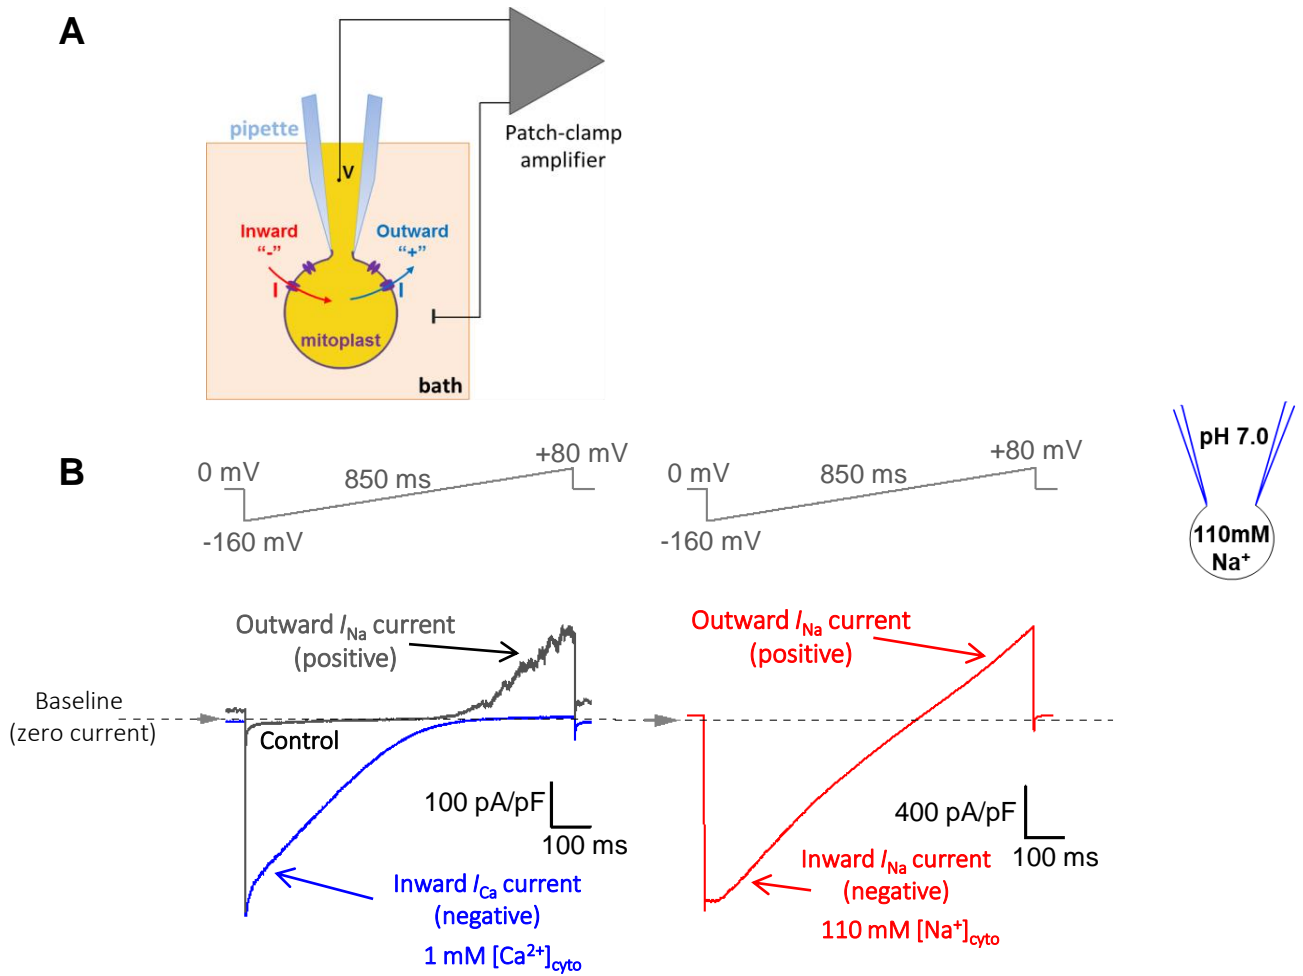

**Fig. S3**

1030 **Fig. S4. Protein expression of MCU subunits in MEFs and isolated mitoplasts. (A)** Co-  
1031 immunoprecipitation of the MCU complex proteins from mitochondrial and mitoplast fractions.  
1032 Anti-FLAG beads were used to immunoprecipitate MCU-FLAG (expressed in *MCU*<sup>-/-</sup> cells)  
1033 from mitochondrial and mitoplast fractions. Mitochondria isolated from *WT* cells (No FLAG tag)  
1034 were used as negative control. Left three lanes are protein-complexes immunoprecipitated with  
1035 anti-FLAG beads. Lane-1: immunoprecipitate (IP) from MCU-FLAG mitochondrial (Mt) lysate,  
1036 lane-2: IP from MCU-FLAG mitoplast (Mp) lysate, lane-3: IP from *WT* mitochondrial lysate.  
1037 Right three lanes correspond to samples from the flow-through fraction after  
1038 immunoprecipitation. Lane-1\*: mitochondrial lysate from MCU-FLAG, lane-2\*: mitoplast lysate  
1039 from MCU-FLAG, lane-3\*: mitochondrial lysate from *WT*. Upper (MICU1, MCU and EMRE)  
1040 and lower (MICU2 and TOM20) boxes are from the same samples run on different gels. **(B)**  
1041 Western blots of protein lysates from cells with *WT* MCU complex (*WT*), *MCU*<sup>-/-</sup> cells, and  
1042 *MCU*<sup>-/-</sup> cells overexpressing MCU (MCU-OE) using anti-MCU and anti-TOM20 (the  
1043 mitochondrial loading control). **(C)** Western blots of protein lysates from *WT* cells, *EMRE*<sup>-/-</sup>  
1044 cells, and *EMRE*<sup>-/-</sup> cells overexpressing EMRE (EMRE-OE) using anti-EMRE, anti-TOM20 and  
1045 anti-HSP60 (the mitochondrial loading controls).

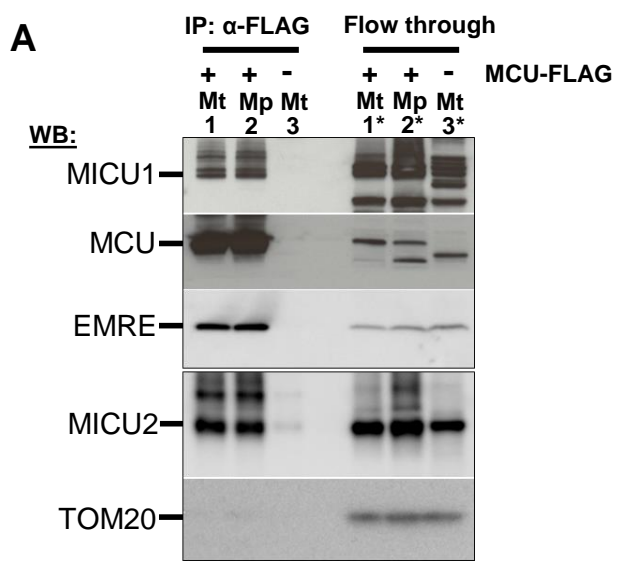

Mt: Mitochondria  
Mp: Mitoplast

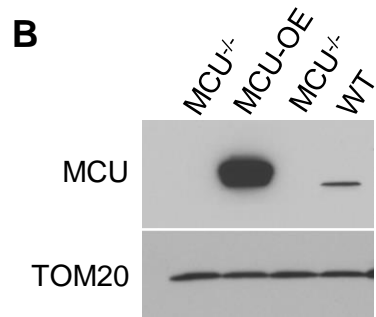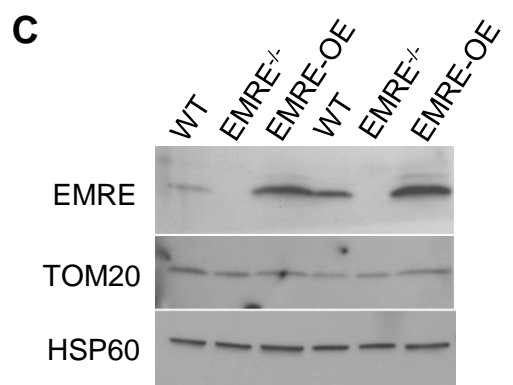

Fig. S4

1046 **Fig. S5.  $I_{Ca}$  in MICU1–3 knockouts.** (A)  $I_{Ca}$  amplitude in *WT* and MICU1-3 knockouts  
1047 measured at -160 mV using 10  $\mu$ M  $[Ca^{2+}]_{cyto}$  with an enlarged Y-axis. Data is same as used in  
1048 Fig. 1E. Mean  $\pm$  SEM; one-way ANOVA with post-hoc Tuckey test; \*\* $p < 0.01$ . (B)  
1049 Representative inward  $I_{Ca}$  in *WT*, *MICU1*<sup>-/-</sup>, *MICU2*<sup>-/-</sup> and *MICU3*<sup>-/-</sup> mitoplasts exposed to 5 mM,  
1050 and 25 mM  $[Ca^{2+}]_{cyto}$ . (C)  $I_{Ca}$  amplitude measured at -80 mV in *WT* ( $n = 13$ ), *MICU1*<sup>-/-</sup> ( $n = 14$ ),  
1051 *MICU2*<sup>-/-</sup> ( $n = 8$ ) and *MICU3*<sup>-/-</sup> ( $n = 9$ ) mitoplasts at 10  $\mu$ M, 100  $\mu$ M and 1000  $\mu$ M  $[Ca^{2+}]_{cyto}$  (*left*,  
1052 for  $I_{Ca}$  traces see Fig. 2A) and at 5 mM and 25 mM  $[Ca^{2+}]_{cyto}$  (*right*, for  $I_{Ca}$  traces see Figure 1D).  
1053 Mean  $\pm$  SEM; one-way ANOVA with post-hoc Tuckey test; \*\*\* $p < 0.001$ .

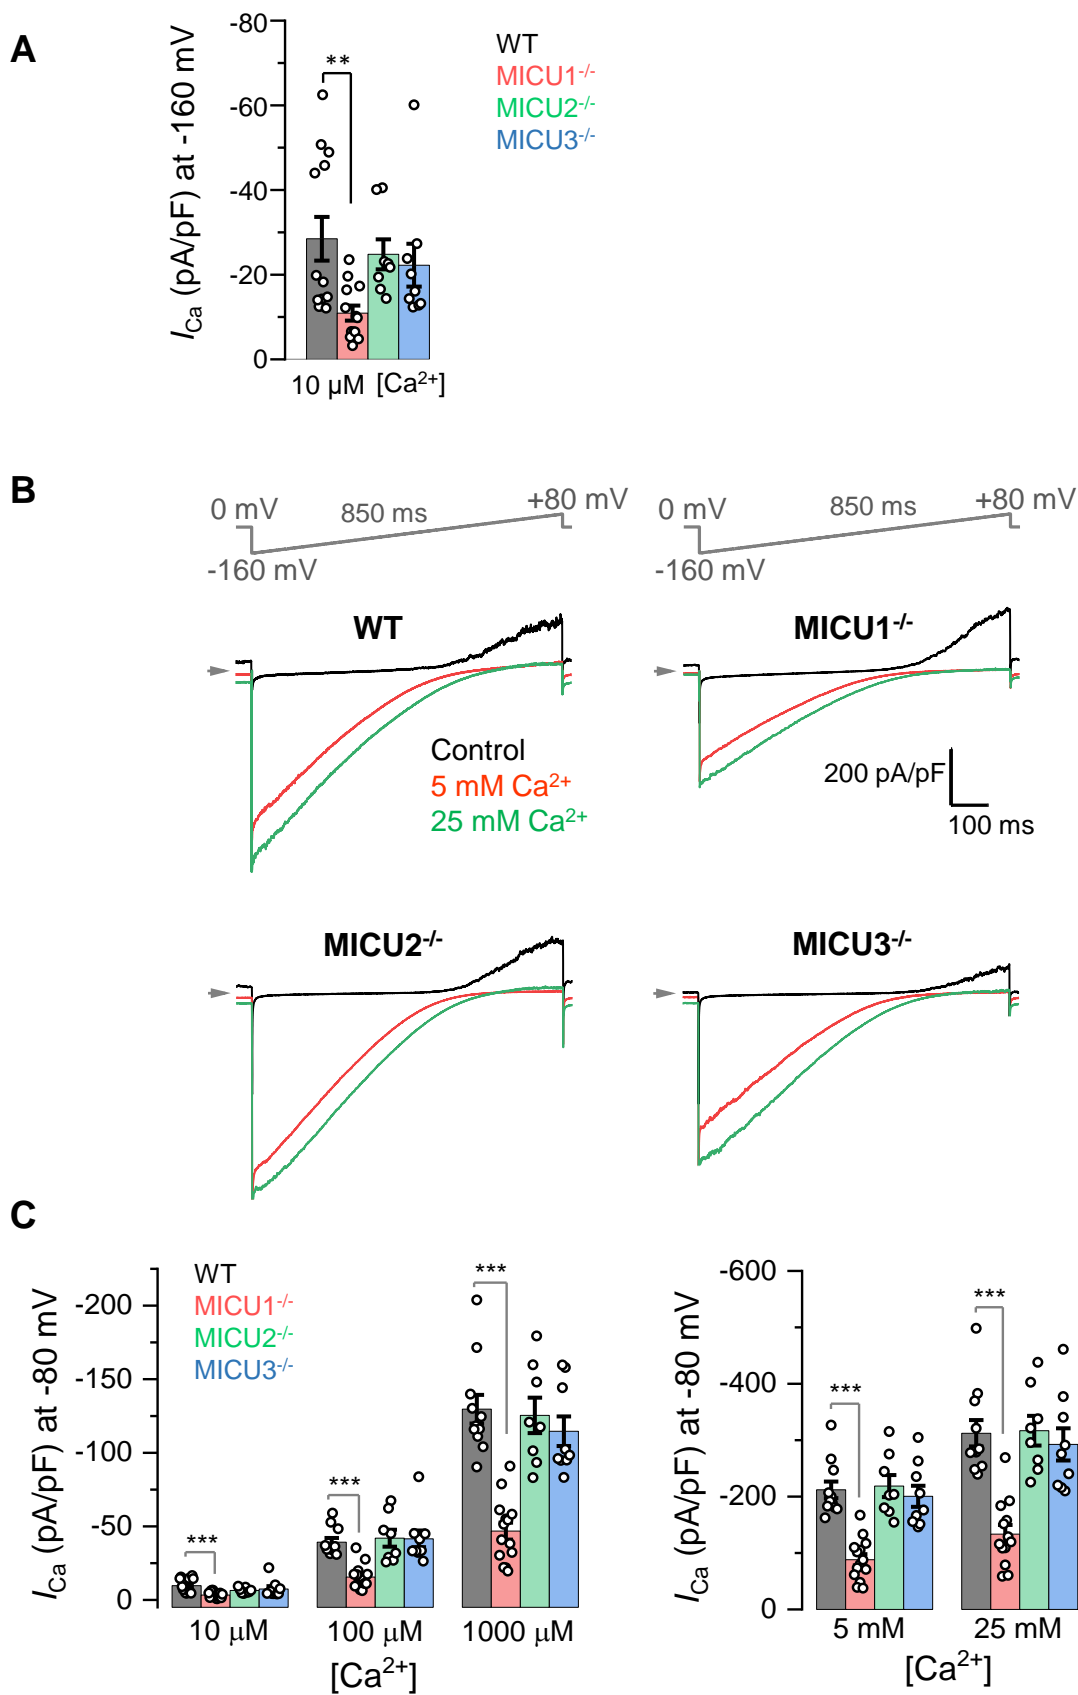

**Fig. S5**

1054 **Fig. S6. Rescue of EMRE expression in *MICUI*<sup>-/-</sup> does not rescue *I*<sub>Ca</sub>.** (A to C) Western blots  
1055 showing the expression levels of EMRE (A), MCU (B) and MCUb (C) in cells with *WT* MCU  
1056 complex and *MICUI*<sup>-/-</sup> (*n* = 3 independent samples each). (D) (*Left*) Western blots showing  
1057 EMRE protein level in *WT* and *MICUI*<sup>-/-</sup> (before and after EMRE overexpression). (*Right*)  
1058 Graph represents quantification of Western blot (*n* = 4 independent samples each). (E)  
1059 Representative inward *I*<sub>Ca</sub> in *WT*, *MICUI*<sup>-/-</sup>, and when EMRE was overexpressed in *MICUI*<sup>-/-</sup>  
1060 (*MICUI*<sup>-/-</sup> + EMRE) upon exposure to 100 μM and 1000 μM [Ca<sup>2+</sup>]<sub>cyto</sub>. (F) *I*<sub>Ca</sub> amplitudes  
1061 measured at -160 mV in *MICUI*<sup>-/-</sup> overexpressing EMRE (*MICUI*<sup>-/-</sup> + EMRE, *n* = 8) as well as  
1062 in *MICUI*<sup>-/-</sup> and *WT*. *WT* and *MICUI*<sup>-/-</sup> data are the same as in Fig. 1E. Mean ± SEM; one-way  
1063 ANOVA with post-hoc Tuckey test. \**p* < 0.05; \*\**p* < 0.01; \*\*\**p* < 0.001.



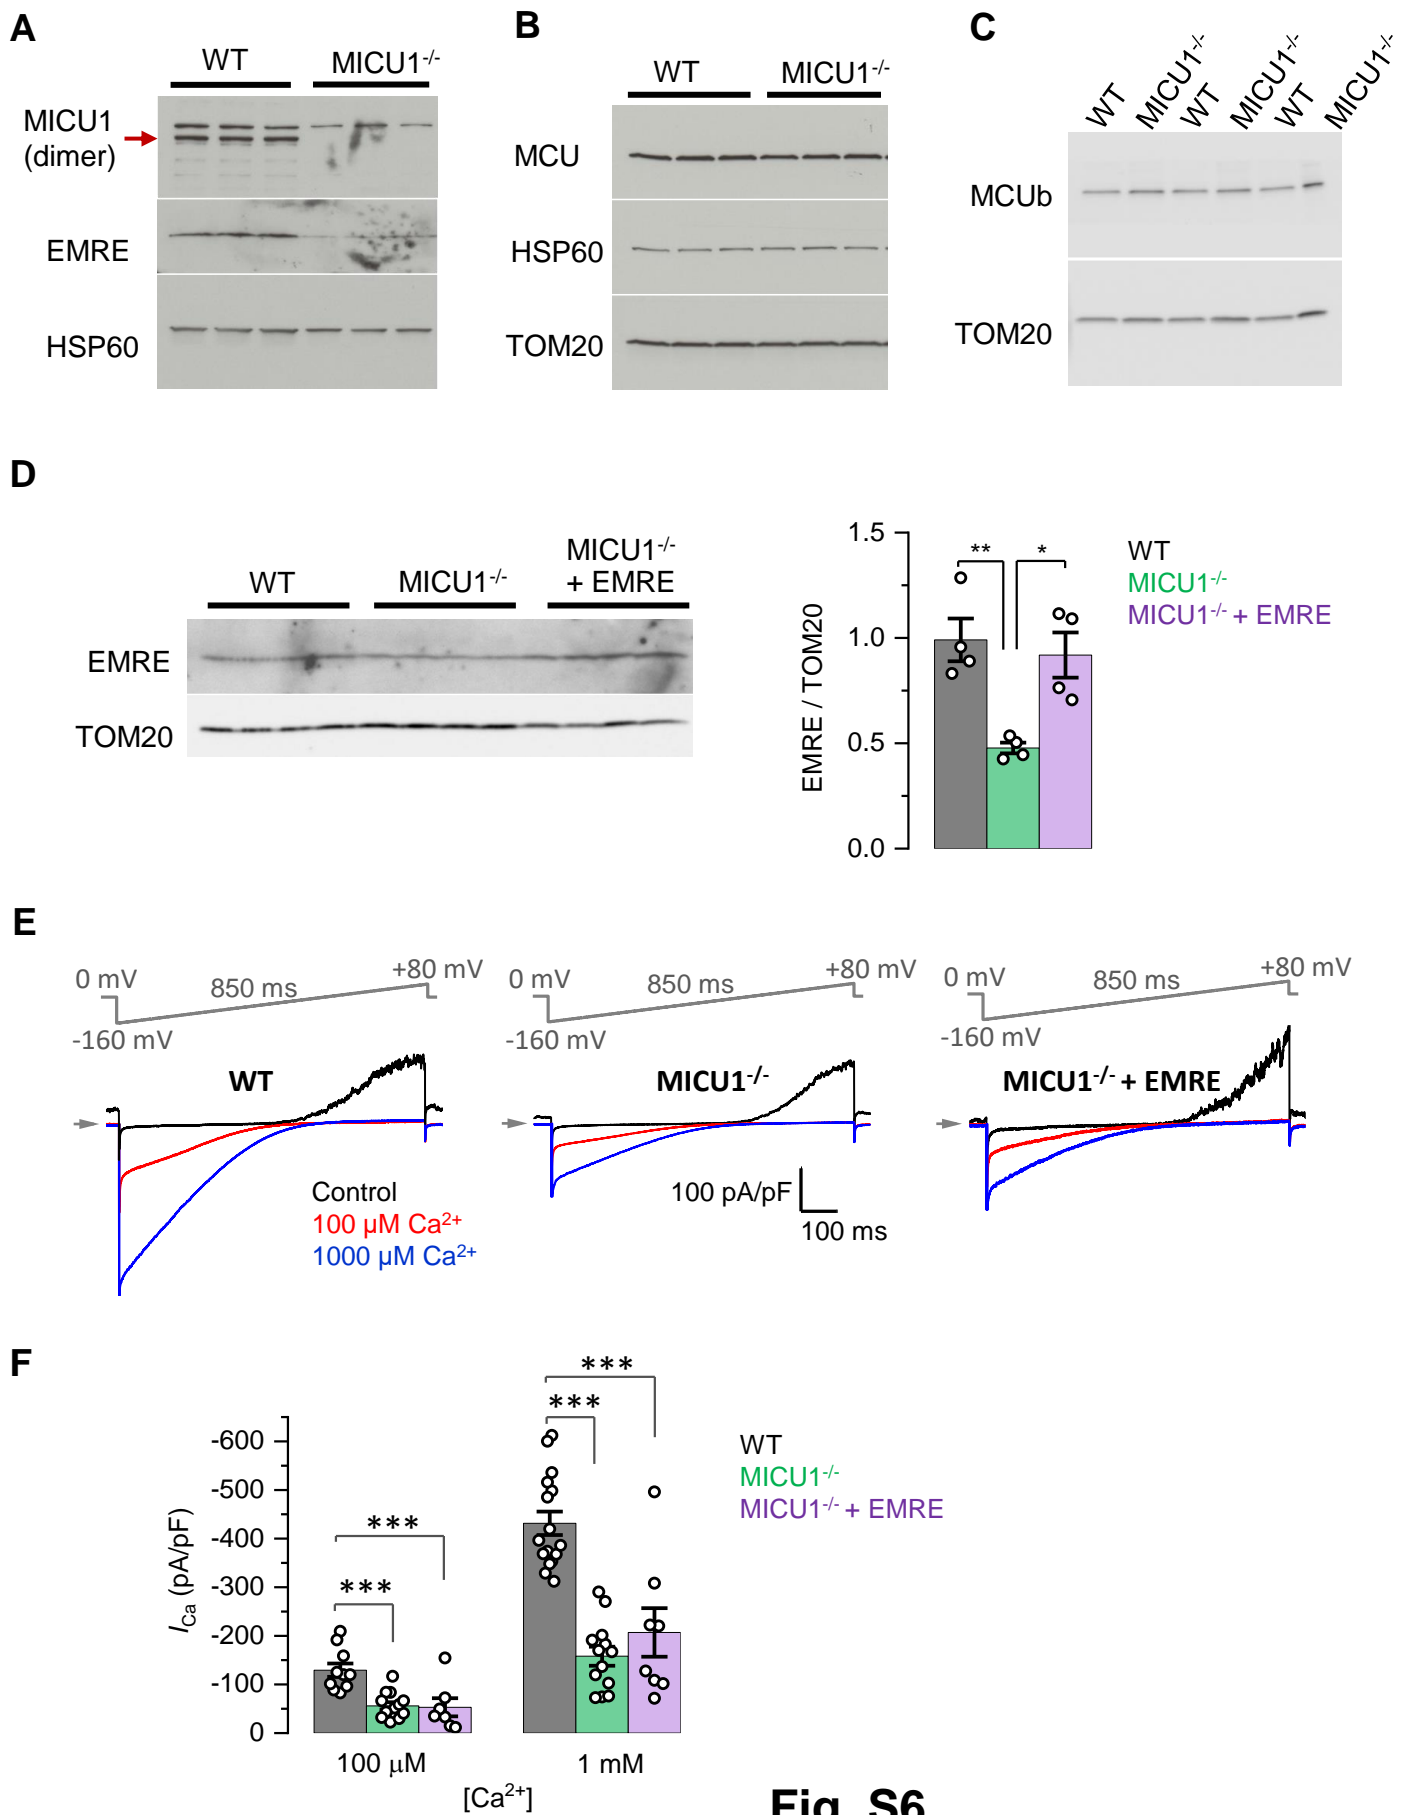

1064 **Fig. S7. Drp1 does not affect the currents mediated by the MCU complex or their**  
1065 **phenotype in *MICU1*<sup>-/-</sup>.** (A)  $I_{Ca}$  amplitudes at -160 mV (*left*) and -80 mV (*right*) in mitoplasts  
1066 from MEFs with Drp1 (*Drp1*<sup>+/+</sup>) and without Drp1 (*Drp1*<sup>-/-</sup>). ( $n = 17-19$ ) Mean  $\pm$  SEM. (B)  $I_{Na}$   
1067 amplitudes at -160 mV (*left*) and -80 mV (*right*) in mitoplasts from MEFs with Drp1 (*Drp1*<sup>+/+</sup>,  $n =$   
1068 8) and without Drp1 (*Drp1*<sup>-/-</sup>,  $n = 21$ ). Mean  $\pm$  SEM. (C to F) Current phenotypes of *MICU1*<sup>-/-</sup> in  
1069 mitoplasts isolated from MEFs with an intact Drp1. (C) Representative  $I_{Ca}$  (*blue*) and  $I_{Na}$  (*red*)  
1070 recorded from the *WT* ( $n = 7$ ) and *MICU1*<sup>-/-</sup> ( $n = 12$ ) mitoplasts exposed to 1 mM  $[Ca^{2+}]_{cyto}$  or  
1071 110 mM  $[Na^+]_{cyto}$ . Amplitudes of  $I_{Na}$  (D) and  $I_{Ca}$  (E) measured at -80 mV. (F) Ratio between  $I_{Ca}$   
1072 and  $I_{Na}$  measured in the same mitoplast. Mean  $\pm$  SEM; unpaired t-test, two-tailed; \*\*\* $p < 0.001$ .

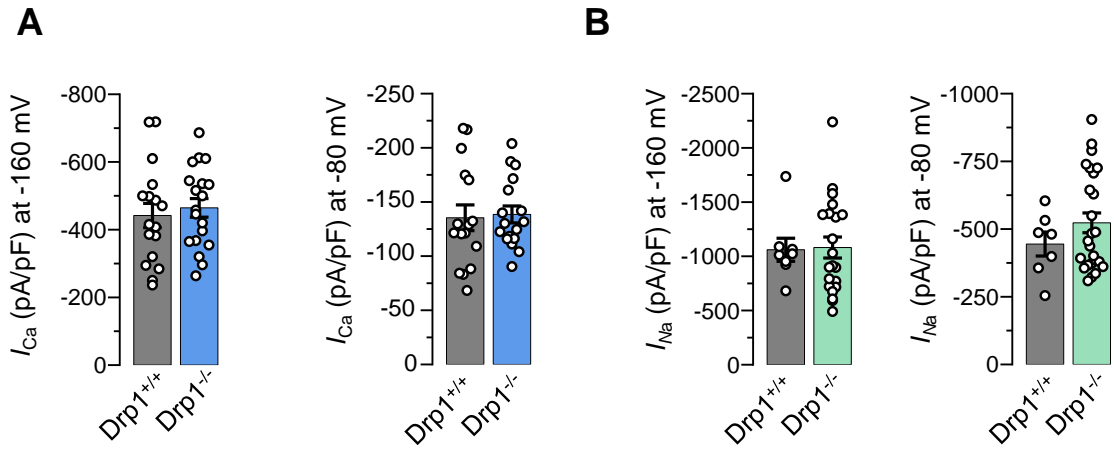

**Mitoplasts from MEFs with intact Drp1**

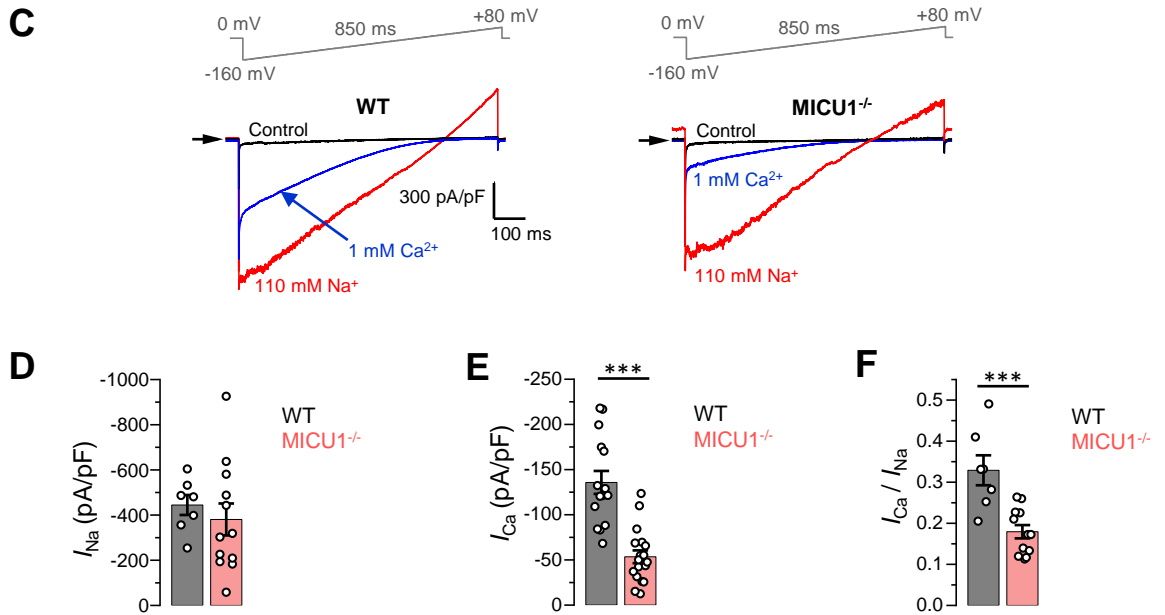

**Fig. S7**

1073 **Fig. S8. Expression levels of different MCU subunits in *MICU2*<sup>-/-</sup> MEFs and the open**  
1074 **probability of MCU at different potentials. (A to C) Western blots showing the expression**  
1075 **levels of MICU2 (A), MCU, EMRE, MICU3 (B) and MICU1 dimers (C) in *WT* and *MICU2*<sup>-/-</sup>**  
1076 **cells (*n* = 3–6 independent samples each). For detection of MICU1 dimers, samples were**  
1077 **prepared in Laemmli buffer without  $\beta$ -mercaptoethanol.**

**A**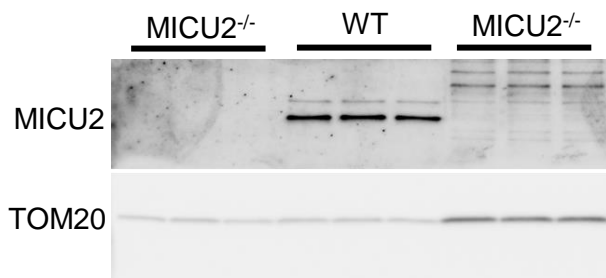**B**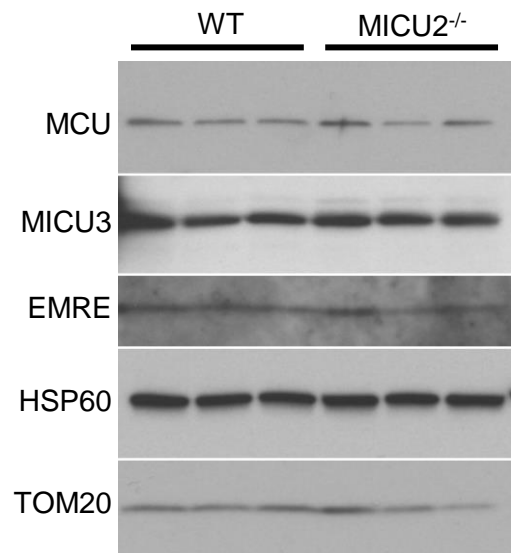**C**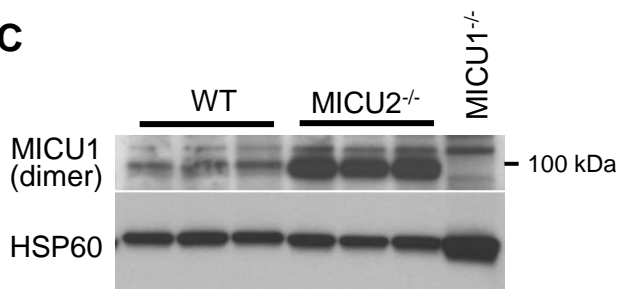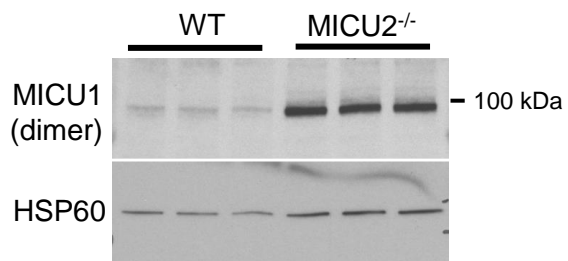**Fig. S8**

1078 **Fig. S9. Matrix  $\text{Ca}^{2+}$  does not inhibit  $I_{\text{Ca}}$ .** (*Upper Panels*) Inward  $I_{\text{Ca}}$  in the presence of 0 (*left*),  
1079 400 nM (*middle*) and 400  $\mu\text{M}$  (*right*)  $[\text{Ca}^{2+}]_{\text{mito}}$  (pipette solution).  $[\text{Ca}^{2+}]_{\text{cyto}}$  was 100  $\mu\text{M}$ , 1 mM  
1080 or 5 mM. (*Lower Panel*)  $I_{\text{Ca}}$  amplitudes at 0 ( $n=3-5$ ), 400 nM ( $n=4$ ) or 400  $\mu\text{M}$  ( $n=3$ )  $[\text{Ca}^{2+}]_{\text{mito}}$ .  
1081  $I_{\text{Ca}}$  was measured at -160 mV and in different  $[\text{Ca}^{2+}]_{\text{cyto}}$  as indicated. Mean  $\pm$  SEM; one-way  
1082 ANOVA with post-hoc Tuckey test.

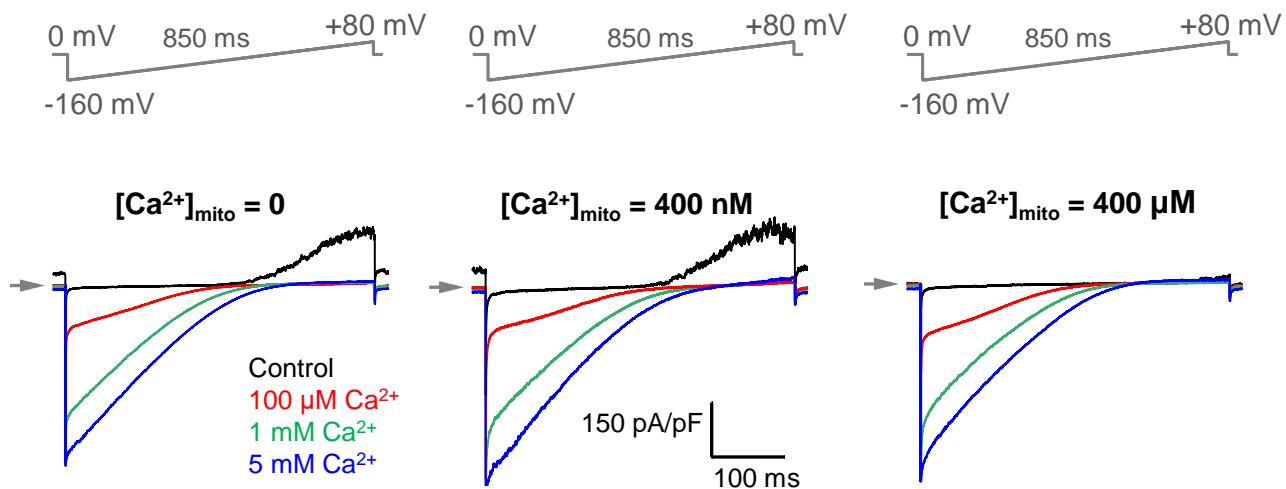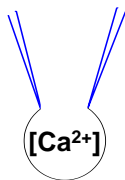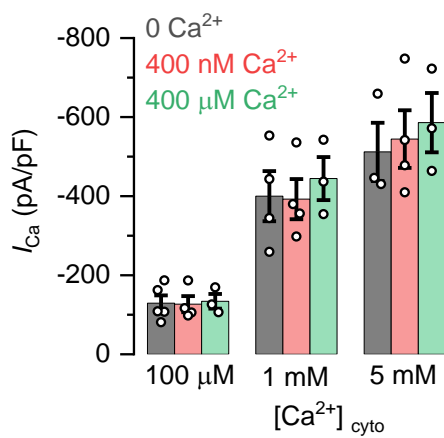

**Fig. S9**

1083 **Fig. S10. Open probability of the MCU channel in *WT* and *MICUI*<sup>-/-</sup>.** (A to C) Open probability  
1084 of the MCU channel in *WT* ( $n=5-6$ ) and *MICUI*<sup>-/-</sup> ( $n=5$ ) at -40 mV (A) -80 mV (B) and at -120  
1085 mV (C). The same *WT* and knockout data were used as in Fig. 4D, but presented to show data  
1086 distribution. Mean  $\pm$  SEM; unpaired t-test, two-tailed; \*\* $p < 0.01$ .



**A**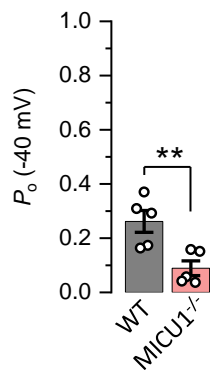**B**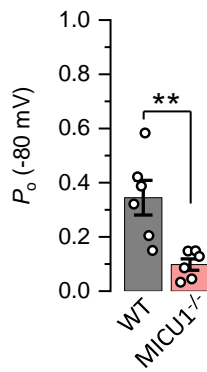**C**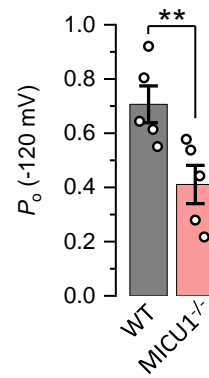**Fig. S10**

1087 **Table S1. MICU1 effect on MCU as determined by previous electrophysiological**  
1088 **experiments.**

1089

| Citation                                                                                                                                | MCU current            |                         |
|-----------------------------------------------------------------------------------------------------------------------------------------|------------------------|-------------------------|
|                                                                                                                                         | Low $[Ca^{2+}]_{cyto}$ | High $[Ca^{2+}]_{cyto}$ |
| Hoffman et al., 2013 (44)                                                                                                               |                        | Inhibition              |
| Patron et al., 2014 (25)<br>Lipid bilayer experiments;<br>EMRE subunit, essential for MCU activity and<br>MICU1 interaction, was absent | No effect              | Activation              |
| Vais et al., 2016 (43)                                                                                                                  |                        | No change               |
| Kamer et al., 2018 (42)                                                                                                                 |                        | No change               |

1090

1091 **Table S2. MICU1 effect on MCU as determined by previous Ca<sup>2+</sup> imaging experiments.**

1092

| Reference                         | Effect of MICU1 on mitochondrial Ca <sup>2+</sup> uptake |                                          |
|-----------------------------------|----------------------------------------------------------|------------------------------------------|
|                                   | Low [Ca <sup>2+</sup> ] <sub>cyto</sub>                  | High [Ca <sup>2+</sup> ] <sub>cyto</sub> |
| Mallilankaraman et al., 2012 (28) | Inhibition                                               | No effect                                |
| Hoffman et al., 2013 (44)         | Inhibition                                               | Inhibition                               |
| Plovanich et al., 2013 (23)       |                                                          | Activation                               |
| Csordas et al., 2013 (29)         | Inhibition                                               | Activation                               |
| de la Fuente et al., 2014 (31)    | Inhibition                                               | Activation                               |
| Kamer and Mootha, 2014 (24)       | Inhibition                                               |                                          |
| Logan et al., 2014 (30)           | Inhibition                                               | No effect                                |
| Patron et al., 2014 (25)          | Inhibition                                               | Inhibition                               |
| Hall et al., 2014 (72)            |                                                          | Inhibition                               |
| Antony et al., 2016 (36)          | Inhibition                                               | Activation                               |
| Liu et al., 2016 (32)             | Inhibition                                               | Activation                               |
| Bhosale et al., 2017 (73)         | Inhibition                                               |                                          |
| Kamer et al., 2017 (50)           | Inhibition                                               |                                          |
| Paillard et al., 2018 (34)        | Inhibition                                               | Activation                               |
| Phillips et al., 2018 (33)        | Inhibition                                               |                                          |

1093

1094    **REFERENCES**

- 1095    70.    F. A. Ran *et al.*, Genome engineering using the CRISPR-Cas9 system. *Nat Protoc* **8**, 2281-2308  
1096            (2013).  
1097
- 1098    71.    G. Grynkiewicz, M. Poenie, R. Y. Tsien, A new generation of Ca<sup>2+</sup> indicators with greatly improved  
1099            fluorescence properties. *J Biol Chem* **260**, 3440-3450 (1985).  
1100
- 1101    72.    D. A. Winter, *Biomechanics and motor control of human movement*. (Wiley, Hoboken, N.J., ed.  
1102            4th, 2009), pp. xiv, 370 pages.  
1103
- 1104    73.    D. D. Hall, Y. Wu, F. E. Domann, D. R. Spitz, M. E. Anderson, Mitochondrial calcium uniporter  
1105            activity is dispensable for MDA-MB-231 breast carcinoma cell survival. *PLoS One* **9**, e96866 (2014).  
1106
- 1107    74.    G. Bhosale *et al.*, Pathological consequences of MICU1 mutations on mitochondrial calcium  
1108            signalling and bioenergetics. *Biochim Biophys Acta Mol Cell Res* **1864**, 1009-1017 (2017).
